# The spatial signal in area LIP is not an obligatory correlate of perceptual evidence during informed saccadic choices

Joshua A Seideman, Terrence R Stanford<sup>1</sup>, and Emilio Salinas<sup>1\*</sup>

Department of Neurobiology and Anatomy, Wake Forest School of Medicine, 1 Medical Center Blvd., Winston-Salem, NC 27157-1010, USA

<sup>1</sup>Co-senior authors

\*Correspondence should be addressed to:

Emilio Salinas  
Department of Neurobiology and Anatomy  
Wake Forest School of Medicine  
1 Medical Center Blvd.  
Winston-Salem, NC 27157-1010, USA  
Phone: (336) 713-5176  
e-mail: [esalinas@wakehealth.edu](mailto:esalinas@wakehealth.edu)  
[www.urgentchoicelab.org](http://www.urgentchoicelab.org)

**Abbreviations:** CRDM, compelled random dot motion; RDM, random dot motion; RF, response field; rPT, raw processing time; RT, reaction time; SD, standard deviation; SE, standard error

**Running title:** LIP differentiation dissociated from evidence accumulation

**Grants:** Research was supported by the NIH through grants R01EY025172, R01EY021228 and F31EY029154 from the NEI, and by the NIH-NINDS Training Grant T32NS073553.

**Disclosures:** The authors declare no conflicts of interest, financial or otherwise.

**Author contributions:** JAS, ES and TRS designed the research; JAS collected data; JAS, ES and TRS analyzed data; JAS, ES and TRS wrote the manuscript.

**Keywords:** attention, accumulation of evidence, choice, decision making, eye movement, parietal cortex, perception

1 The lateral intraparietal area (LIP) contains spatially selective neurons that are partly respon-  
2 sible for determining where to look next and are thought to serve a variety of sensory, motor  
3 planning, and cognitive control functions within this role<sup>1,2,3</sup>. Notably, according to numerous  
4 studies in monkeys<sup>4,5,6,7,8,9,10,11,12</sup>, area LIP implements a fundamental perceptual process, the  
5 gradual accumulation of sensory evidence in favor of one choice (e.g., look left) over another  
6 (look right), which manifests as a slowly developing spatial signal during a motion discrimina-  
7 tion task. However, according to recent inactivation experiments<sup>13,14</sup>, this signal is unnecessary  
8 for accurate task performance. Here we reconcile these contradictory findings. We designed an  
9 urgent version of the motion discrimination task in which there is no systematic lag between  
10 the perceptual evaluation and the motor action reporting it, and such that the evolution of the  
11 subject's choice can be tracked millisecond by millisecond<sup>15,16,17,18</sup>. We found that while choice  
12 accuracy increased steeply with increasing sensory evidence, at the same time, the spatial se-  
13 lection signal in LIP became progressively weaker, as if it hindered performance. In contrast,  
14 in a similarly urgent task in which the discriminated stimuli and the choice targets were spa-  
15 tially coincident, this neural signal seemed to facilitate performance. The data suggest that  
16 the LIP activity traditionally interpreted as evidence accumulation may correspond to a slow,  
17 post-decision shift of spatial attention from one location (where the motion occurs) to another  
18 (where the eyes land).

19 The lateral intraparietal area (LIP) combines sensory and cognitive information to highlight be-  
20 haviorally relevant locations or visual features to look at. Although this may involve many sophis-  
21 ticated perceptual operations<sup>3,19,20,21</sup>, the accumulation of sensory evidence (or, more generally,  
22 temporal integration) is one of major theoretical importance. First, by some accounts<sup>22,23</sup>, it is an  
23 obligatory antecedent to perceptually guided choices regardless of task details, sensory modal-  
24 ity, or effector. And second, its manifestation in LIP provides key experimental justification for  
25 sequential sampling models, which comprise the most widespread computational framework for  
26 reproducing reaction time (RT) and accuracy data in deterministic choice tasks<sup>24,25,26,27</sup>. In this  
27 framework, the gradual differentiation between spatial locations signaled by LIP corresponds di-  
28 rectly to the gradual formation of the perceptual decision<sup>28,29</sup>.

29 The random-dot motion (RDM) discrimination task (Fig. 1a) has been pivotal to this functional  
30 interpretation. In it, the subject must look at one of two choice targets to indicate the net direction  
31 of motion of a cloud of flickering dots, and in numerous variants of the task<sup>4,5,6,7,8,9,10,11,12</sup>, LIP  
32 neurons gradually signal the chosen location while simultaneously reflecting the particulars of  
33 the perceptual discrimination. However, in recent inactivation experiments<sup>13,14</sup>, the LIP spatial  
34 signal was disrupted with minimal consequence to performance (effects were seen on RT but  
35 not on accuracy), consistent with a more indirect relationship between LIP activity and decision  
36 formation<sup>29,30</sup>.

37 We propose a simple yet potentially far-reaching explanation for this puzzling combination of  
38 findings: the perceptual evaluation of the motion stimulus occurs more rapidly (~200 ms) than is  
39 generally assumed and may *precede* the LIP differentiation in many instances. So, what appears  
40 to be a gradual accumulation of sensory evidence is likely the byproduct of task designs that  
41 promote a slow, post-decision shift of attention from one spatial location (where the dots are) to  
42 another (where the chosen target is).

43 This hypothesis makes a stark prediction. Consider the RDM task performed with high ur-  
44 gency, such that perceptual and motor planning processes run concurrently (Fig. 1b, c). This will  
45 produce correct trials that are rapid (low RT) but still informed by the motion stimulus. If LIP  
46 neurons accumulate evidence, then in those trials they must still differentiate and indicate the  
47 impending choice, with stronger evidence yielding stronger differentiation. Alternatively, if the

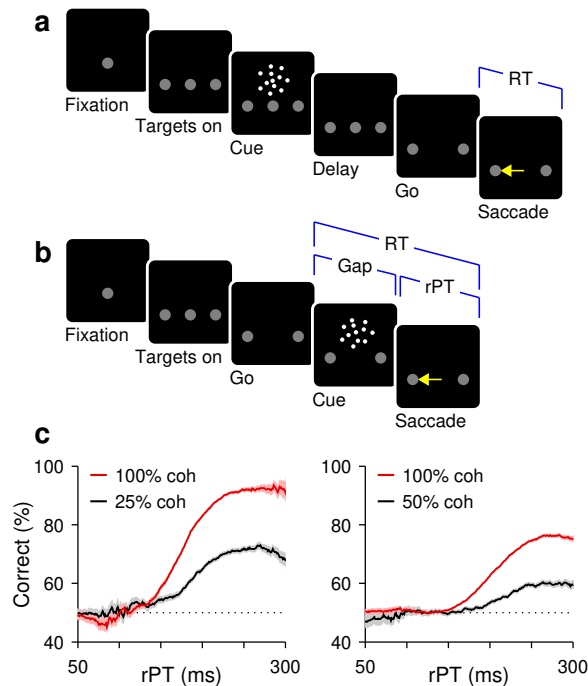

**Figure 1.** Urgent and non-urgent motion discrimination tasks. Subjects had to report the direction of motion (left or right) of a cloud of flickering dots by looking at one of two peripheral targets. **a**, RDM task (non-urgent). The motion stimulus is presented and evaluated (Cue, 600–1000 ms) well before the go signal (fixation point offset; Go). **b**, CRDM task (urgent). The motion stimulus is presented (Cue) after the go signal (Go), with an unpredictable delay between them (Gap, 0–250) and a limited RT time window for responding (350–425 ms). The perceptual evaluation must occur during the cue-viewing interval (rPT = RT – gap), as the motor plan develops. **c**, Percentage of correct responses as a function of rPT, or tachometric curve. Results are from CRDM behavioral sessions for monkeys C (left) and T (right) for 100% (red; C: 9544, T: 33974 trials) and a lower coherence (black; C: 7909, T: 12066 trials). Shades indicate  $\pm 1$  SE from binomial statistics.

48 spatial differentiation in LIP occurs after the motion stimulus has been evaluated, its develop-  
 49 ment on such rapid trials will be curtailed, and stronger evidence will not prevent its attenuation  
 50 or abolition altogether.

### 51 *Urgent versus non-urgent choices*

52 To test this prediction, we recorded single-neuron activity in area LIP during two variants of the  
 53 RDM discrimination task. In the standard, non-urgent version (Fig. 1a), the motion stimulus is  
 54 presented first (Cue, 600–1000 ms) and is followed by the offset of the fixation point (Go), which  
 55 means “respond now!” In the urgent or compelled random-dot motion (**CRDM**) discrimination  
 56 task (Fig. 1b), the order of events is reversed: the go signal is given first, before the stimulus  
 57 is shown, and the subject must respond within a short time window after the go (350–425 ms).  
 58 Although the required perceptual judgment is the same, the tasks differ critically in the order in  
 59 which perceptual and motor processes are engaged. In the former, the saccade can be prepared  
 60 with relative leisure, after the perceptual evaluation is completed, whereas in the latter, the motor  
 61 plan is initiated early and the perceptual evaluation must occur while the developing motor plan  
 62 advances. Under time pressure, saccades can be triggered before, during, or shortly after the  
 63 perceptual evaluation, and may result in guesses, partially informed, or fully informed choices  
 64 (Fig. 1c). Perceptual and motor performance are effectively decoupled<sup>15,16,17,18</sup> (Fig. S1).

65 Two monkey subjects performed the two choice tasks in interleaved blocks of trials (in addition  
 66 to single-target tasks traditionally used to characterize LIP activity; Fig. 2a, b). In the standard,  
 67 non-urgent RDM task, most choices were correct (93% and 84% correct for monkeys C and T  
 68 at 100% coherence; Fig. S2), and the recorded LIP activity evolved as reported previously<sup>4,5,8,11</sup>  
 69 (Fig. 2c). The neurons responded briskly upon presentation of a choice target in the response  
 70 field (**RF**), continued firing at an elevated rate, and began signaling the choice about 200 ms after  
 71 the onset of the motion stimulus (Fig. 2d, red arrow), at which point their activity increased for  
 72 saccades into the RF and decreased for saccades away.

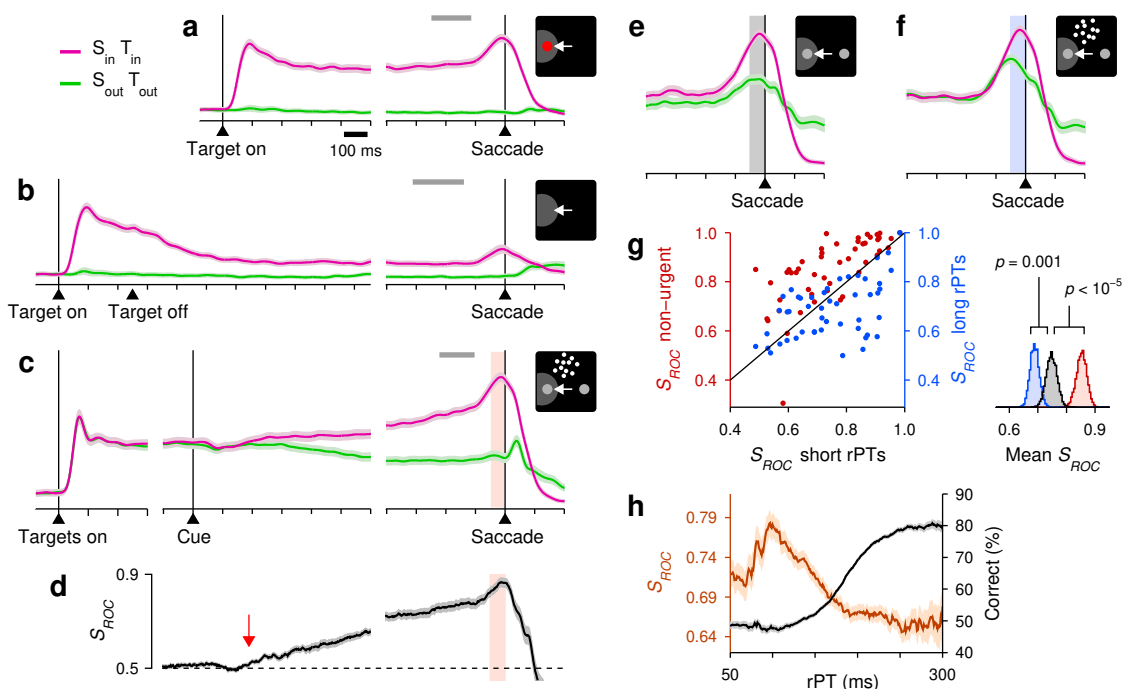

**Figure 2.** LIP activity in urgent versus non-urgent random-dot motion discrimination. **a**, Responses during visually guided saccades. Traces show normalized firing rate (mean  $\pm$  1 SE across cells;  $n = 50$ ) as a function of time for correct trials into (magenta) or away from the cell's RF (green). Same scales for other panels. The gray bar indicates the go signal range for 90% of the trials. **b**, Responses during memory guided saccades ( $n = 49$ ). **c**, Responses in the non-urgent RDM task ( $n = 51$ ). **d**, Spatial signal magnitude as a function of time for the data in **c** (same time axis). Throughout the article,  $S_{ROC}$  measures the statistical separation between inward and outward responses (Methods). Red arrow marks approximate onset of differentiation. **e**, **f**, Responses in the CRDM task ( $n = 51$ ) during guesses (**e**,  $rPT \leq 150$  ms) and fully informed choices (**f**,  $rPT \geq 200$  ms). **g**, Presaccadic  $S_{ROC}$  for individual neurons ( $n = 51$ ) during guesses (x-axis) and fully informed choices in the CRDM task (right y-axis), and in the non-urgent RDM task (left y-axis). Spike counts for computing  $S_{ROC}$  are from shaded windows in **c**–**f**. Side plot shows bootstrapped distributions of mean values. **h**, Behavioral (black) and neuronal (brown) performance curves from the same CRDM sessions (mean  $\pm$  1 SE across trials).  $S_{ROC}$  is from presaccadic spikes pooled across neurons ( $n = 51$ ) and sorted by rPT (bin width = 51 ms). All motion data are for 100% coherence.

73 To interpret this growing differential signal (quantified by  $S_{ROC}$ , Fig. 2d) as an immediate  
 74 correlate of the perceptual evaluation — one that is causal to the choice — one must assume  
 75 that the evaluation begins about 200–250 ms after cue onset. And indeed, many experiments are  
 76 consistent with such a protracted time scale<sup>6,7,8,10,11,24</sup>. However, none of these studies tracked  
 77 the timecourse of performance explicitly, moment by moment. By doing this, we find that after  
 78 250 ms of stimulus viewing time the motion discrimination is essentially over.

### 79 *Perceptual and neural discrimination under time pressure*

80 In the CRDM task, the key variable is the amount of time during which the stimulus can be seen  
 81 and analyzed before movement onset, which we call the raw processing time (rPT, computed as  
 82 RT – gap in each trial; Fig. 1b). Plotting choice accuracy as a function of rPT yields a detailed,  
 83 high-resolution account of the temporal evolution of the perceptual judgment (Figs. 1c, 2h). Ac-  
 84 cording to this ‘tachometric’ curve, in trials with  $rPT \lesssim 140$  ms the stimulus is seen so briefly that  
 85 the motion direction cannot be resolved, which results in uninformed choices, or guesses ( $\sim 50\%$

86 correct). Choice accuracy then rises rapidly after the 150 ms mark, reaching asymptotic perfor-  
87 mance for rPTs of 200–250 ms. This amount of viewing time is sufficient for evaluating the RDM  
88 stimulus and reliably determining its motion direction.

89 As in other urgent tasks with similar designs<sup>15,16,17,18</sup>, the rPT measured in each trial quantifies  
90 the degree to which sensory evidence guided the corresponding choice (or the probability that  
91 the choice was guided). Thus, if the differential signal in LIP reflects the amount of evidence  
92 accumulated in each trial, then it should be larger for fully informed discriminations (at long  
93 rPTs) than for guesses (at short rPTs), and its evolution should parallel the rise of the tachometric  
94 curve.

95 Contrary to this expectation, the recorded LIP activity showed quite the opposite. During  
96 performance of the CRDM task, the neural responses favoring each of the two possible eye move-  
97 ments were clearly separated just prior to saccade onset (Fig. 2e, f). Quantitatively, the presaccadic  
98 separation was less definitive than that in the non-urgent condition (Fig. 2g, red data), but the ur-  
99 gent differential signal still pointed reliably to the eventual choice. Crucially, however, across the  
100 sample of individual neurons recorded in the CRDM task ( $n = 51$ ), the differential signal mea-  
101 sured during fully informed, correct choices (rPT  $\geq 200$  ms) was considerably weaker than that  
102 during guesses (rPT  $\leq 150$  ms; Fig. 2g, blue data,  $p = 0.001$ , permutation test). More evidence  
103 yielded less differentiation. Furthermore, when the presaccadic responses were pooled across  
104 neurons and binned by rPT to assess how the spatial signal develops as a continuous function  
105 of processing time (Methods), the resulting neurometric curve decreased steadily for rPT  $> 100$   
106 ms (Fig. 2h, brown curve) — in sharp contrast to choice accuracy (Fig. 2h, black curve). In the  
107 CRDM task, the stronger the influence of perception on the choice, the weaker the observed LIP  
108 differentiation.

### 109 *Relationship between LIP differentiation and trial outcome*

110 Everything else being equal, the neural encoding of perceptual information upon which choices  
111 are made is typically more robust for correct than for incorrect outcomes<sup>31,32,33,34</sup>. This is true  
112 across tasks, circuits, and modalities, and should apply to urgent choices too. During short-rPT  
113 trials (rPT  $\leq 150$  ms), the differential response in LIP was identical for correct and incorrect choices  
114 (Fig. 3a, gray bars), as anticipated given that those were all guesses. During informed discrimina-  
115 tions (rPT  $> 150$  ms), however, the differentiation was greater for errors than for correct choices  
116 (Fig. 3a, b, blue vs. purple data,  $p = 0.0006$ , resampling test) — again, opposite to the trend  
117 expected from an evidence accumulation process.

118 In urgent tasks, the relationship between behavioral performance and single-neuron activity  
119 is revealed most effectively by conditioning the former on the latter. First, for a given experimen-  
120 tal condition (saccade into or away from the RF), the spike counts collected from a neuron are  
121 sorted by magnitude (above vs. below the median), and then performance is compared across the  
122 corresponding groups of trials (Fig. S3; Methods). The resulting tachometric curves conditioned  
123 on evoked activity reveal if, when, and how the subject's behavior changes when the recorded  
124 neurons fire more or less than average. According to this analysis, performance was consistently  
125 worse ( $p < 10^{-5}$ , resampling test) in trials that were congruent with stronger spatial differentiation  
126 (Fig. 3c), as if a more robust spatial signal interfered with the urgent motion discrimination.

### 127 *Spatial conflict within LIP*

128 Why is the LIP differentiation suppressed in the CRDM task, and more so for informed choices?  
129 There are two likely reasons, both brought about by urgency. First, the differential signal is  
130 curtailed when it has less time to develop (Fig. 2g, red data), a general effect<sup>18</sup> consistent with

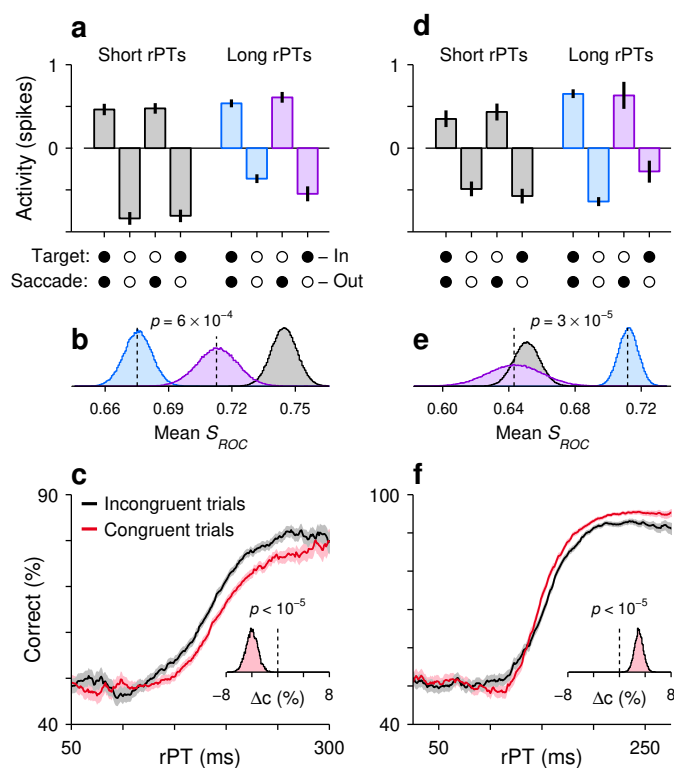

**Figure 3.** LIP differentiation may help or hinder performance. **a**, LIP activity in the CRDM task during guesses (rPT  $\leq 150$  ms, gray) and informed choices (rPT  $> 150$  ms, blue, purple) sorted by outcome (x-axis). Activity indicates presaccadic spike counts normalized and pooled across neurons ( $n = 51$ ). Data are mean and 95% CIs across trials. **b**, Differential signal magnitudes for the three conditions in **a** indicated by color. Curves are bootstrapped distributions. **c**, Performance in the CRDM task conditioned on neuronal activity. Trials were classified according to their presaccadic spike counts as either congruent (red) or incongruent (black) with strong differentiation. Inset shows bootstrapped distribution for the mean difference in percent correct between curves for rPTs of 130–230 ms. **d–f**, As in **a–c**, but for the urgent color discrimination task ( $n = 56$ ; in **d, e**, rPT  $\leq 125$  ms for guesses and rPT  $> 125$  ms for informed choices; in **f**, difference evaluated for rPTs between 140–280 ms).

our initial hypothesis. And second, given LIP's participation in attentional deployment<sup>2,35,36</sup>, the particular geometry of the task must create a spatial conflict: the early motor plan, initiated shortly after the go signal<sup>15,18</sup>, automatically allocates attentional resources to the planned saccade endpoint(s)<sup>37,38,39,40</sup>, but attention should be directed to the RDM stimulus, which defines the perceptually relevant location<sup>13,14</sup>. A spatial competition ensues<sup>35,41</sup>. Evidence of this is plainly manifest in the behavioral CRDM data (Fig. S4).

To investigate the contributions of these two factors, limited time and attentional conflict, we recorded LIP activity from the same monkeys during two versions, urgent and non-urgent, of a discrimination task in which the subject must make an eye movement to the peripheral stimulus that matches the color of the fixation point<sup>42</sup> (Fig. S5). The key difference here is that the conflict described above is eliminated: the relevant color cues are found at the choice targets, and deploying attention/perceptual resources to them should be of benefit, if not a necessity, to the required discrimination (Fig. S6).

During the non-urgent color-matching task, the sampled neurons (which again exhibited characteristic LIP response features; Fig. 4a, b) differentiated saccades into versus away from the RF (Fig. 4c, d) slightly earlier than during the standard RDM task (Figs. 2d, 4d, arrows). But, overall, under relaxed, non-urgent conditions, the evoked spatial signal developed with comparable timecourse and strength in the motion- and color-based tasks, in spite of their distinct spatial and feature requirements. Under time pressure, though, the comparison across tasks was striking. During the urgent color-matching task, the differential response in LIP was larger for informed than uninformed discriminations (Fig. 4e–g); its magnitude increased over time in parallel with the monkeys' choice accuracy (Fig. 4h); it was weaker for errors than correct choices during informed trials (Fig. 3d, e); and it acted as if to improve the monkeys' performance (Fig. 3f). In this case, the greater the influence of perception on the choice, the stronger the spatial signal observed in LIP.

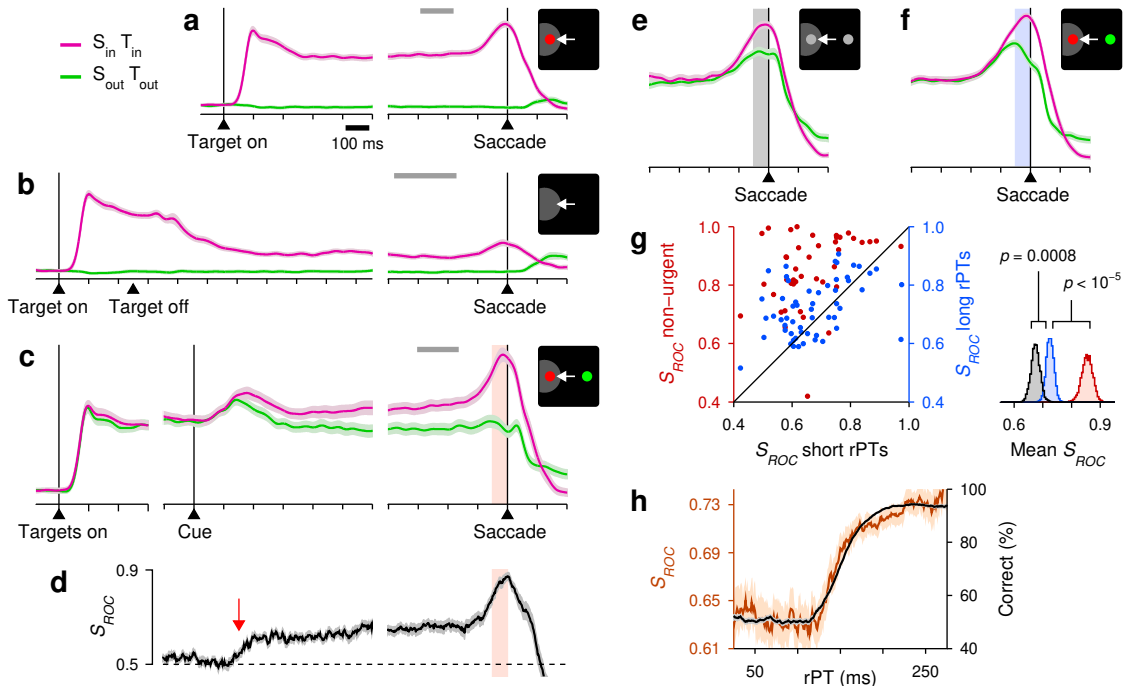

**Figure 4.** LIP activity in urgent versus non-urgent color discrimination. Same format and conventions as in Fig. 2. Data are from  $n = 56$  sampled neurons, except in c, d, and g (red data), for which  $n = 43$ . In e, rPT  $\leq 125$  ms. In f, rPT  $\geq 175$  ms.

156 These results in the color-matching task experiment confirm that an informed spatial signal  
 157 can emerge very rapidly in LIP<sup>43,44</sup>. They show that time pressure alone does not necessarily  
 158 abolish or reverse the expected correlation between evidence and LIP differentiation, and so can-  
 159 not explain the CRDM results. Rather, the data suggest that the anticorrelation between CRDM  
 160 performance and LIP spatial signal strength results from urgency exacerbating a spatial conflict  
 161 between the perceptually relevant location and the saccade endpoint. In this case, early selection  
 162 of the saccade target corresponds to attention being diverted away from the location of the dots  
 163 during a brief but critical period of time when the motion stimulus is being evaluated.

164 Notably, an early bias favoring choices into the RF is visible in the CRDM data (Fig. 2e), but this  
 165 simply reflects a consistent preference for the initial guess that is required of the subjects in every  
 166 urgent trial. Such consistency is of little consequence to the perceptual evaluation<sup>9,15</sup>. Indeed,  
 167 the results did not change qualitatively when this bias was eliminated on a trial-by-trial basis  
 168 (Fig. S7), nor when it was either enhanced or suppressed by suitable selection of experimental  
 169 sessions (Figs. S8) or recorded trials (Fig. S9). Also, for both the motion- and color-based tasks the  
 170 results were robust with respect to the subjects' performance level (Fig. S10), the criteria used for  
 171 including/excluding neurons (Figs. S11, S12, S13), and how the effects were quantified (Fig. S14).

## 172 Conclusions

173 The highly robust target selection seen during non-urgent conditions (RDM task) would lead  
 174 one to conclude, as have countless past studies, that LIP differentiation is an obligatory, causal  
 175 antecedent to perceptually informed choices, and that greater differentiation implies more or  
 176 stronger perceptual evidence. Yet, for equally informed choices made urgently (CRDM task),  
 177 the spatial signal was markedly diminished, and it decreased with increasing evidence. While

178 counterintuitive, this result remains consistent with a representation of spatial priority<sup>2,35,41</sup>.

179 In general, the differential activation of oculomotor neurons denotes the potential for selection  
180 of different relevant locations besides the eventual saccade target. These may contain reward in-  
181 formation, a visual cue, a symbolic instruction, or a salient distracter<sup>2,35,36,45,46,47</sup>. Such versatility  
182 is the hallmark of attention-related activity. During motion discrimination, the location that is  
183 relevant to the perceptual evaluation is where the dots are, and indeed, inactivation experiments  
184 indicate that the LIP neurons with RFs covering the dots are precisely the ones that matter the  
185 most for performance<sup>13,14</sup>. Under urgent conditions (CRDM task), stronger differentiation be-  
186 tween the two perceptually irrelevant choice-target locations would denote a firmer attentional  
187 commitment, and likely a stronger conflict with the RFs covering the dots. However, when the  
188 urgency requirement is relaxed (standard RDM task), attention can be deployed to the location of  
189 the dots even before motion onset, and can remain there as long as necessary to then shift to the  
190 chosen saccade target. The focus on the dots need not be long ( $\lesssim 100$  ms, considering the time  
191 to transition from chance to asymptotic performance; Figs. 1c, 2h), and the timecourse and mag-  
192 nitude of the shift may still depend on the strength of the sensory evidence. If so, the resulting  
193 post-perceptual differentiation may appear causal to the choice.

## 194 **Methods**

### 195 *Subjects and setup*

196 All experimental procedures were conducted in accordance with NIH guidelines, USDA regula-  
197 tions, and the policies set forth by the Institutional Animal Care and Use Committee (IACUC) of  
198 Wake Forest School of Medicine. The subjects in this experiment were two adult male rhesus mon-  
199 keys (*Macaca mulatta*) weighing between 8.5 and 11 kg. For each animal, an MRI-compatible post  
200 (Crist Instruments, MD, USA) was implanted on the skull while under general anesthesia. The  
201 post served to fix the position of the head during all experimental sessions. Following head-post  
202 implantation, both subjects were trained to perform oculomotor response tasks in exchange for  
203 water reward. After reaching a criterion level ( $> 75\%$  accuracy for each task), craniotomies were  
204 made and recording cylinders (Crist Instruments, MD, USA) were placed over the left LIP of each  
205 monkey (monkey C: left hemisphere; monkey T: left and right hemispheres; stereotactic coordi-  
206 nates: 5 posterior, 12 lateral<sup>48,49</sup>) while under general anesthesia. Neural recordings commenced  
207 after a 1-2 week recovery period following cylinder placement.

### 208 *Behavioral and neurophysiological recording systems*

209 Eye position was monitored using an EyeLink 1000 Plus infrared tracking system (SR Research;  
210 Ottawa, Canada) at a sampling rate of 500 or 1000 Hz. For sessions in which dot-motion tasks  
211 were performed, all gaze-contingent stimulus presentation and reward delivery were controlled  
212 using Psychtoolbox<sup>50,51</sup> version 2.0; for all other sessions, gaze-contingent stimulus presentation  
213 and reward delivery were controlled via a custom-designed PC-based software package (Ryklin  
214 Software). Visual stimuli were presented on a Viewpixx/3D display (Vpixx Technologies, Quebec,  
215 Canada; 1920  $\times$  1080 screen resolution, 120 Hz refresh rate, 12 bit color) placed 57 cm away from  
216 the subject. Viewing was binocular. Neural activity was recorded using single tungsten micro-  
217 electrodes (FHC, Bowdoin, ME; 2–4 M $\Omega$  impedance at 1 kHz) driven by a hydraulic microdrive  
218 (FHC). A Cereplex M headstage (Blackrock Microsystems, Utah, USA) filtered (0.03 Hz – 7.5 kHz),  
219 amplified, and digitized electrical signals, which were then sent to a Cereplex Direct (Blackrock  
220 Microsystems) data acquisition system. Single neurons were isolated online based on amplitude  
221 criteria and/or waveform characteristics.



## 222 Behavioral tasks

223 Three design elements are the same for all the tasks. (1) Each trial begins with presentation of a  
224 central spot and the monkey fixating it for 300–800 ms. (2) The offset of the fixation spot is the  
225 go signal that instructs the monkey to make a saccade. (3) To yield a reward (drop of liquid), the  
226 saccade must be to the correct location and must be initiated within an allotted RT window. The  
227 RT is always measured as the time elapsed between fixation offset and saccade onset (equal to the  
228 time point following the go signal at which the eye velocity first exceeds a criterion of 25 deg/s).  
229 In non-urgent tasks the monkey is allowed to initiate an eye movement within 600 ms of the go  
230 signal, whereas in urgent tasks this must happen within 350–425 ms.

231 *Visually- and memory-guided saccade tasks:* Two standard single-target tasks were used to char-  
232 acterize the visuomotor properties of LIP neurons. In both tasks, after the monkey fixates, a pe-  
233 ripheral target is presented (Target on) either within or diametrically opposed to the RF of the  
234 recorded neuron. For the delayed visually-guided saccade task, after a variable delay (500–1000  
235 ms), the fixation spot disappears (Go) and the monkey is required to make a saccade to the periph-  
236 eral target. For the memory-guided saccade task, after being displayed for 250 ms, the peripheral  
237 target is extinguished (Target off) and the monkey is required to maintain fixation throughout a  
238 subsequent delay interval (500–1000 ms). After this memory interval, the fixation spot disappears  
239 (Go) and the monkey is required to make a saccade to the remembered target location.

240 *Non-urgent RDM motion discrimination task:* This two-alternative task (Fig. 1a) is similar to pre-  
241 vious implementations of the RDM discrimination task<sup>4,5,8,11</sup>. Upon fixation and after a short  
242 delay (300–500 ms), two gray stimuli, the potential targets, are presented (Targets on), one in the  
243 RF and one diametrically opposed. After a delay (250–750 ms), a cloud of randomly moving dots  
244 appears in the center of the screen or just above the fixation point for 600–1000 ms (Cue). Then,  
245 after another delay period (300–500 ms; Delay), the fixation spot is extinguished (Go), which in-  
246 structs the monkey to make a choice. If the saccade is to the stimulus in the direction of the dot  
247 motion (and is made within 600 ms), the monkey obtains a liquid reward. The direction of motion,  
248 toward one choice target or the other, is assigned randomly from trial to trial. The difficulty of the  
249 task varies with stimulus coherence, which is the percentage of dots that move in a consistent di-  
250 rection across video frames. Monkeys worked with coherence values of 100%, 50%, 25%, 6% and  
251 3%, but the neural data were recorded at 100% (Fig. S2).

252 *Compelled random-dot motion discrimination task:* The CRDM task (Fig. 1b) is an urgent version of  
253 the RDM discrimination task just described. The geometry, reward size, and stimuli are the same;  
254 only the temporal requirements are different. In this case, the monkey fixates, the two peripheral  
255 gray stimuli are shown (Targets on), and after a delay (250–750 ms), the go signal is given (Go),  
256 urging the subject to respond as quickly as possible (within 350–425 ms). At this point in the trial,  
257 however, no information is available yet to guide the choice. That information, conveyed by the  
258 cloud of flickering dots, is revealed later (Cue), after an unpredictable amount of time following  
259 the go (Gap; 0–250 ms). Subjects are tasked with looking to the peripheral choice alternative that  
260 is congruent with the net direction of motion of the dots (Saccade).

261 On each trial, the raw processing time, or rPT, is the maximum amount of time that is poten-  
262 tially available for seeing and evaluating the motion stimulus. It is the time interval between cue  
263 onset and saccade onset ( $rPT = RT - \text{gap}$ ). We refer to it as ‘raw’ because it includes any afferent  
264 or efferent delays in the circuitry<sup>15</sup>. Gap values (0–250 ms) varied randomly from trial to trial and  
265 were chosen to yield rPTs covering the full range between guesses and informed choices.

266 *Non-urgent color discrimination task:* In this task (Fig. S5a), the color of the central fixation spot  
267 (red or green) defines the identity of the eventual target. Upon fixation and after a short delay  
268 (300–800 ms), two gray stimuli, the potential targets, are presented (Targets on), one in the RF

269 and one diametrically opposed. After a delay (250–750 ms), one of the gray stimuli changes to  
270 red and the other to green (Cue). After a cue viewing period (500–1000 ms), the fixation spot is  
271 extinguished (Go), which instructs the monkey to make a choice. If the ensuing saccade is to the  
272 stimulus that matches the color of the prior fixation spot and is made within 600 ms, the monkey  
273 obtains a reward. Colors and locations for target and distracter are randomly assigned in each  
274 trial.

275 *Urgent color discrimination task:* This task (Fig. S5b), also referred to as the compelled-saccade  
276 task<sup>15,16,18,42</sup>, requires the same red-green discrimination as in the easier non-urgent version. In  
277 this case, after the monkey fixates (300–800 ms) and the two gray stimuli in the periphery are  
278 displayed (Targets on; 250–750 ms), the fixation spot disappears (Go). This instructs the monkey  
279 to make a choice, although the visual cue that informs the choice (one gray spot turning red and  
280 the other green; Cue) is revealed later, after an unpredictable period of time following the go  
281 signal (Gap; 0–250 ms). To obtain a reward, the monkey must look to the peripheral stimulus that  
282 matches the color of the initial fixation spot (Saccade) within the allowed RT window (350–425  
283 ms). As with the CRDM task, the key variable that determines performance is the rPT.

#### 284 *Tachometric curves and rPT intervals*

285 All data analyses were performed in Matlab (The MathWorks, Natick MA). To compute the tacho-  
286 metric curve and rPT distributions, trials were grouped into rPT bins of 51 ms, with bins shifting  
287 every 1 ms. Numbers of correct and incorrect trials were then counted within each bin.

288 When parsing trials into short and long rPT time bins (Figs. 2e–g, 3a, b, d, e, 4e–g), we consid-  
289 ered the distributions of processing times from all the recording sessions in each task. The thresh-  
290 old for guesses ( $rPT \leq 150$  for the CRDM task;  $rPT \leq 125$  ms for the color task) corresponded to  
291 the point at which the fractions of correct and incorrect trials started diverging steadily with rPT.  
292 Trials above this cutoff were considered informed, and trials above this cutoff plus 50 ms, which  
293 brought the fraction correct about 75% of the way from chance to asymptotic, were considered  
294 fully informed. The results depended minimally on the exact cutoffs used.

295 Tachometric curves conditioned on neuronal activity (Fig. 3c, f) were computed as follows.  
296 First, for each neuron, spike counts from a presaccadic window (–50:0 ms, aligned on saccade)  
297 were collected and sorted into two conditions, saccade-in ( $S_{in}$ ) and saccade-out ( $S_{out}$ ) choices.  
298 The trials in each condition were then split into two groups, with spike counts below the median  
299 for the condition, or with spike counts at or above it. Four groups of trials resulted:  $S_{in}$  high  
300 firing,  $S_{in}$  low firing,  $S_{out}$  high firing, and  $S_{out}$  low firing. Data from all the neurons in a sample  
301 were aggregated, and a tachometric curve was generated for each group (Fig. S3). The first and last  
302 groups are congruent with a strong spatial signal, whereas the other two are incongruent. Because  
303 the results were consistent for  $S_{in}$  and  $S_{out}$  conditions (Fig. S3), congruent and incongruent trials  
304 were combined across conditions.

305 For the CRDM data, differences between tachometric curves conditioned on low versus high  
306 firing were quantified and evaluated for significance (see below) for rPTs of 130–230 ms. This  
307 same range was used for all such analyses, regardless of how the data were parsed. For the urgent  
308 color discrimination data, the corresponding range was 140–280 ms.

#### 309 *Characterization of neural activity*

310 On line, RF location was determined from activity levels measured around the time of saccade  
311 onset during performance of the visually- or memory-guided saccade task. All neurons included  
312 in the current study ( $n = 51$  for CRDM task,  $n = 56$  for urgent color discrimination task) were sig-  
313 nificantly activated during performance of the urgent tasks, both in response to visual stimuli pre-

314 sented in their RF (window: 20:150 ms, aligned on targets on) as well as prior to saccades executed  
315 into their RF (window: -100:0 ms, aligned on saccade) relative to respective baseline measures. In  
316 addition, all neurons included exhibited significant delay period activity in the visually- and/or  
317 memory-guided saccade tasks. For all such determinations, significance ( $p < 0.01$ ) was calculated  
318 numerically via permutation tests<sup>52</sup> in which the two group labels (e.g., ‘baseline’ and ‘response  
319 period’) were randomly permuted. These physiological response properties (i.e., visual, delay pe-  
320 riod, and presaccadic activation) are characteristic of LIP neurons that project directly to saccade  
321 production centers<sup>53</sup> (i.e., the superior colliculus).

322 Some additional neurons that were recorded and fully characterized (15 in the CRDM exper-  
323 iment, 26 in the color-based) were excluded from the studied samples for any of the following  
324 reasons: they had no significant visual or memory activity in the single-target tasks; they were  
325 not significantly activated presaccadically; or their spatial preference for contralateral/ipsilateral  
326 stimuli either was ambiguous or clearly flipped between different tasks. Importantly, though, ex-  
327 cept for small quantitative variations, all results were essentially identical with inclusion of all  
328 such neurons (Fig. S11).

329 For each neuron, continuous firing rate traces, or spike density functions, were generated by  
330 aligning the recorded spike trains to relevant task events (e.g., cue onset, saccade onset), convolv-  
331 ing them with a gaussian kernel ( $\sigma = 15$  ms), and averaging across trials. Normalized population  
332 traces (as in panels a–c, e, f of Figs. 2, 4) were generated by dividing each cell’s response curve by  
333 its maximum firing rate value and then averaging across cells. For each cell, this maximum rate  
334 was calculated from the recorded urgent trials (motion- or color-based) and was used to normalize  
335 the population traces for all other tasks.

### 336 *ROC analyses and neurometric curves*

337 The magnitude of spatial differentiation, or  $S_{ROC}$ , was used to quantify the degree to which LIP  
338 neurons were differentially activated in  $S_{in}$  versus  $S_{out}$  choices. This measure corresponds to  
339 the accuracy with which an ideal observer can classify data samples from two distributions (of  
340 responses in  $S_{in}$  and  $S_{out}$  trials, in this case), and is equivalent to the area under the receiver  
341 operating characteristic, or ROC, curve<sup>54,55</sup>. Values of 0.5 correspond to distributions that are in-  
342 distinguishable (chance performance, full overlap), whereas values of 0 or 1 correspond to fully  
343 distinguishable distributions (perfect performance, no overlap). Here,  $S_{ROC} > 0.5$  always indi-  
344 cates higher activity for saccades into the RF than away from the RF. Presaccadic  $S_{ROC}$  values  
345 (Figs. 2g, h, 3b, e, 4g, h) were computed using spike counts measured prior to choice onset (-50:0  
346 ms, relative to saccade onset) and sorted according to trial outcome.

347 For the urgent tasks, continuous neurometric functions comparable to the behavioral tacho-  
348 metric curves (Figs. 2h, 4h) were generated by first pooling the data across neurons and then cal-  
349 culating  $S_{ROC}$  as a function of rPT (bin width = 51 ms, shifted every 1 ms). The pooling involved  
350 two steps. First, the presaccadic spike counts of each neuron were normalized by subtracting a  
351 constant,  $\theta$ , that was cell-specific, and then the normalized spike counts from all the neurons were  
352 sorted into two groups, for  $S_{in}$  and  $S_{out}$  trials. The pooled  $S_{ROC}$  compared responses from these  
353 two pooled distributions within each rPT bin (see Fig. S15 for an example). For each neuron, the  
354 constant  $\theta$  was equal to  $(m_{in} + m_{out})/2$ , where  $m_{in}$  and  $m_{out}$  are the mean spike counts for  $S_{in}$  and  
355  $S_{out}$  trials. Other normalization schemes produced qualitatively similar trends. This procedure,  
356 pooling the data first and then computing  $S_{ROC}$ , generated more precise results than the reverse,  
357 i.e., first computing  $S_{ROC}$  for each cell and then averaging across cells. However, the latter al-  
358 ternative produced qualitatively consistent results (Fig. S14). We stress that, although the pooled  
359  $S_{ROC}$  values that make up the neurometric curve vary with rPT, they were always based on spike

360 counts measured just prior to the saccade.

361 For the non-urgent tasks (Figs. 2d, 4d), continuous  $S_{ROC}$  values were again computed by di-  
362 viding time into sliding bins (bin width = 50 ms, shifted every 1 ms). For each bin, the spikes  
363 counted for each neuron in each condition ( $S_{in}$  and  $S_{out}$  trials) were used to calculate that cell's  
364  $S_{ROC}$ , and then values were averaged across cells. Pooling was unnecessary in this case because  
365 more data were available in each time bin, but the results with pooling were very similar.

### 366 *Statistical tests*

367 Effect sizes for mean  $S_{ROC}$  values were computed by bootstrapping<sup>56,57</sup>; that is, by repeatedly  
368 resampling the underlying data with replacement ( $10^4 - 10^5$  iterations) and recomputing the mean  
369  $S_{ROC}$  each time. In Figs. 2g, 4g (insets), the resampling was over neurons; in Fig. 3b, e, it was over  
370 trials in the two pooled distributions (for  $S_{in}$  and  $S_{out}$  conditions). Effect sizes for other quantities  
371 (e.g.,  $\Delta c$  in Fig. 3c, f) were also calculated through bootstrapping. Having generated these effect-  
372 size distributions for any two conditions (e.g., correct vs. incorrect choices, or long vs. short rPTs),  
373 we could calculate from them a significance value for the mean difference. Instead, however, for  
374 any relevant comparison between two conditions, the p-value of the difference was calculated  
375 separately using a permutation test<sup>52</sup> for paired data or an equivalent resampling test for non-  
376 paired data, as these tests provide slightly more accurate and specific comparisons against the null  
377 hypothesis (of no difference between the distributions from which the two data sets originated).  
378 For example, to compare the mean  $S_{ROC}$  for short- versus long-rPT trials (Figs. 2g, 4g, insets), we  
379 randomly permuted the 'short' and 'long' labels for each neuron and recomputed the difference  
380 between  $S_{ROC}$  means  $10^5$  times. All reported significance values were calculated similarly, via  
381 permutation or resampling tests (one-sided).

### 382 **References**

- 383 1. Snyder, L.H., Batista, A.P., and Andersen, R.A. (2000). Intention-related activity in the poste-  
384 rior parietal cortex: a review. *Vision Res.* 40, 1433–1442.
- 385 2. Bisley JW, Goldberg ME (2010) Attention, intention, and priority in the parietal lobe. *Annu*  
386 *Rev Neurosci* 33:1–21.
- 387 3. Freedman DJ, Ibos G (2018) An integrative framework for sensory, motor, and cognitive func-  
388 tions of the posterior parietal cortex. *Neuron* 97:1219–1234.
- 389 4. Shadlen MN, Newsome WT (2001) Neural basis of a perceptual decision in the parietal cortex  
390 (area LIP) of the rhesus monkey. *J Neurophysiol* 86:1916–1936.
- 391 5. Roitman JD, Shadlen MN (2002) Response of neurons in the lateral intraparietal area during  
392 a combined visual discrimination reaction time task. *J Neurosci* 22: 9475–9489.
- 393 6. Huk AC, Shadlen MN (2005) Neural activity in macaque parietal cortex reflects temporal  
394 integration of visual motion signals during perceptual decision making. *J Neurosci* 25:10420–  
395 1036.
- 396 7. Hanks TD, Ditterich J, Shadlen MN (2006) Microstimulation of macaque area LIP affects  
397 decision-making in a motion discrimination task. *Nat Neurosci* 9:682–689.
- 398 8. Kiani R, Hanks TD, Shadlen MN (2008) Bounded integration in parietal cortex underlies  
399 decisions even when viewing duration is dictated by the environment. *J Neurosci* 28:3017–  
400 3029.
- 401 9. Rorie AE, Gao J, McClelland JL, Newsome WT (2010) Integration of sensory and reward  
402 information during perceptual decision-making in lateral intraparietal cortex (LIP) of the

- 403 macaque monkey. *PLoS One* 5:e9308.
- 404 10. Churchland AK, Kiani R, Chaudhuri R, Wang XJ, Pouget A, Shadlen MN (2011) Variance as  
405 a signature of neural computations during decision making. *Neuron* 69:818–831.
- 406 11. de Lafuente V, Jazayeri M, Shadlen MN (2015) Representation of accumulating evidence for  
407 a decision in two parietal areas. *J Neurosci* 35:4306–4318.
- 408 12. Kira S, Yang T, Shadlen MN (2015) A neural implementation of Wald’s sequential probability  
409 ratio test. *Neuron* 85:861–873.
- 410 13. Katz LN, Yates JL, Pillow JW, Huk AC (2016) Dissociated functional significance of decision-  
411 related activity in the primate dorsal stream. *Nature* 535:285–288.
- 412 14. Zhou Y, Freedman DJ (2019) Posterior parietal cortex plays a causal role in perceptual and  
413 categorical decisions. *Science* 365:180–185.
- 414 15. Stanford TR, Shankar S, Massoglia DP, Costello MG, Salinas E (2010) Perceptual decision  
415 making in less than 30 milliseconds. *Nat Neurosci* 13:379–385.
- 416 16. Costello MG, Zhu D, Salinas E, Stanford TR (2013) Perceptual modulation of motor — but  
417 not visual — responses in the frontal eye field during an urgent-decision task. *J Neurosci*  
418 33:16394–16408.
- 419 17. Salinas E, Steinberg BR, Sussman LA, Fry SM, Hauser CK, Anderson DD, Stanford TR (2019)  
420 Voluntary and involuntary contributions to perceptually guided saccadic choices resolved  
421 with millisecond precision. *eLife* 8:e46359.
- 422 18. Scerra VE, Costello MG, Salinas E, Stanford TR (2019) All-or-none context dependence de-  
423 lineates limits of FEF visual target selection. *Curr Biol* 29:294–305.
- 424 19. Gottlieb J (2007) From thought to action: the parietal cortex as a bridge between perception,  
425 action, and cognition. *Neuron* 53:9–16.
- 426 20. Bennur S, Gold JI (2011) Distinct representations of a perceptual decision and the associated  
427 oculomotor plan in the monkey lateral intraparietal area. *J Neurosci* 31:913–921.
- 428 21. Freedman DJ, Assad JA (2016) Neuronal mechanisms of visual categorization: an abstract  
429 view on decision making. *Annu Rev Neurosci* 39:129–147.
- 430 22. O’Connell RG, Dockree PM, Kelly SP (2012) A supramodal accumulation-to-bound signal  
431 that determines perceptual decisions in humans. *Nat Neurosci* 15:1729–1735.
- 432 23. Twomey DM, Kelly SP, O’Connell RG (2016) Abstract and effector-selective decision sig-  
433 nals exhibit qualitatively distinct dynamics before delayed perceptual reports. *J Neurosci*  
434 36:7346–7352.
- 435 24. Palmer J, Huk AC, Shadlen MN (2005) The effect of stimulus strength on the speed and  
436 accuracy of a perceptual decision. *J Vis* 5:376–404.
- 437 25. Bogacz R, Brown E, Moehlis J, Holmes P, Cohen JD (2006) The physics of optimal decision  
438 making: a formal analysis of models of performance in two-alternative forced-choice tasks.  
439 *Psychol Rev* 113:700–765.
- 440 26. Ratcliff R, McKoon G (2008) The diffusion decision model: theory and data for two-choice  
441 decision tasks. *Neural Comput* 20:873–922.
- 442 27. Forstmann BU, Ratcliff R, Wagenmakers EJ (2016) Sequential sampling models in cognitive  
443 neuroscience: advantages, applications, and extensions. *Annu Rev Psychol* 67:641–666.
- 444 28. Gold JI, Shadlen MN (2007) The neural basis of decision making. *Annu Rev Neurosci* 30:535–

- 445 574.
- 446 29. Huk AC, Katz LN, Yates JL (2017) The role of the lateral intraparietal area in (the study of)  
447 decision making. *Annu Rev Neurosci* 40:349–372.
- 448 30. Yates JL, Park IM, Katz LN, Pillow JW, Huk AC (2017) Functional dissection of signal and  
449 noise in MT and LIP during decision-making. *Nat Neurosci* 20:1285–1292.
- 450 31. Salinas E, Hernández H, Zainos A, Romo R (2000) Periodicity and firing rate as candidate  
451 neural codes for the frequency of vibrotactile stimuli. *J Neurosci* 20:5503–5515.
- 452 32. Cook EP, Maunsell JHR (2002) Dynamics of neuronal responses in macaque MT and VIP  
453 during motion detection. *Nat Neurosci* 10: 985–994.
- 454 33. Matsumora T, Koida K, Komatsu H (2008) Relationship between color discrimination and  
455 neural responses in the inferior temporal cortex of the monkey. *J Neurophysiol* 100:3361–  
456 3374.
- 457 34. Nienborg H, Cohen MR, Cumming BG (2012) Decision-related activity in sensory neurons:  
458 correlations among neurons and with behavior. *Annu Rev Neurosci* 35:463–483.
- 459 35. Bisley JW, Goldberg ME (2003) Neuronal activity in the lateral intraparietal area and spatial  
460 attention. *Science* 299: 81–86.
- 461 36. Herrington TM, Assad JA (2010) Temporal sequence of attentional modulation in the lateral  
462 intraparietal area and middle temporal area during rapid covert shifts of attention. *J Neu-*  
463 *rosci* 30:3287–3296.
- 464 37. Kowler E, Anderson E, Doshier B, Blaser E (1995) The role of attention in the programming  
465 of saccades. *Vision Res* 35:1897–1916.
- 466 38. Deubel H, Schneider WX (1996) Saccade target selection and object recognition: evidence for  
467 a common attentional mechanism. *Vision Res* 36:1827–1837.
- 468 39. Moore T, Fallah M (2004) Microstimulation of the frontal eye field and its effects on covert  
469 spatial attention. *J Neurophysiol* 91: 152–162.
- 470 40. Steinmetz NA, Moore T (2014) Eye movement preparation modulates neuronal responses in  
471 area V4 when dissociated from attentional demands. *Neuron* 83:496–506.
- 472 41. Falkner AL, Krishna BS, Goldberg ME (2010) Surround suppression sharpens the priority  
473 map in the lateral intraparietal area. *J Neurosci* 30:12787–12797.
- 474 42. Seideman JA, Salinas E, Stanford TS (2019) Perceptual modulation of parietal activity during  
475 urgent saccadic choices. *bioRxiv* 2019.12.12.874313 [Preprint].
- 476 43. Ipata AE, Gee AL, Goldberg ME, Bisley JW (2006) Activity in the lateral intraparietal area  
477 predicts the goal and latency of saccades in a free-viewing visual search task. *J Neurosci*  
478 26:3656–3661.
- 479 44. Sapountzis P, Paneri S, Gregoriou GG (2018) Distinct roles of prefrontal and parietal areas in  
480 the encoding of attentional priority. *Proc Natl Acad Sci USA* 115:E8755–E8764.
- 481 45. Ignashchenkova A, Dicke PW, Haarmeier T, Thier P (2004) Neuron-specific contribution of  
482 the superior colliculus to overt and covert shifts of attention. *Nat Neurosci* 7:56–64.
- 483 46. Peck CJ, Jangraw DC, Suzuki M, Efem R, Gottlieb J (2009) Reward modulates attention inde-  
484 pendently of action value in posterior parietal cortex. *J Neurosci* 29:11182–11191.
- 485 47. Zhou HH, Thompson KG (2009) Cognitively directed spatial selection in the frontal eye field  
486 in anticipation of visual stimuli to be discriminated. *Vision Res* 49:1205–1215.

- 487 48. Colby CL, Duhamel JR, Goldberg ME (1996) Visual, presaccadic, and cognitive activation of  
488 single neurons in monkey lateral intraparietal area. *J Neurophysiol* 76:2841–2852.
- 489 49. Snyder LH, Batista AP, Andersen RA (1998) Change in motor plan, without a change in the  
490 spatial locus of attention, modulates activity in posterior parietal cortex. *J Neurophysiol*  
491 79:2814–2819.
- 492 50. Brainard DH (1997). The psychophysics toolbox. *Spatial Vision* 10:433–436.
- 493 51. Kleiner M, Brainard D, Pelli D (2007) Whats new in Psychtoolbox-3? *Perception* 36 (ECP  
494 Abstract Supplement).
- 495 52. Siegel S, Castellan NJ (1988) Nonparametric statistics for the behavioral sciences. Boston,  
496 MA: McGraw-Hill.
- 497 53. Paré M, Wurtz RH (1997) Monkey posterior parietal cortex neurons antidromically activated  
498 from superior colliculus. *J Neurophysiol* 78:3493–3497.
- 499 54. Green DM, Swets JA (1966) Signal Detection Theory and Psychophysics. New York: Wiley.
- 500 55. Fawcett T (2006) An introduction to ROC analysis. *Pattern Recognit Lett* 27:861–874.  
501 doi:10.1016/j.patrec.2005.10.010.
- 502 56. Efron B (1982) The jackknife, the bootstrap and other resampling plans. (Society for Industrial  
503 and Applied Mathematics: Philadelphia).
- 504 57. Hesterberg T (2014) What teachers should know about the bootstrap: resampling in the un-  
505 dergraduate statistics curriculum. arXiv: 1411.5279.

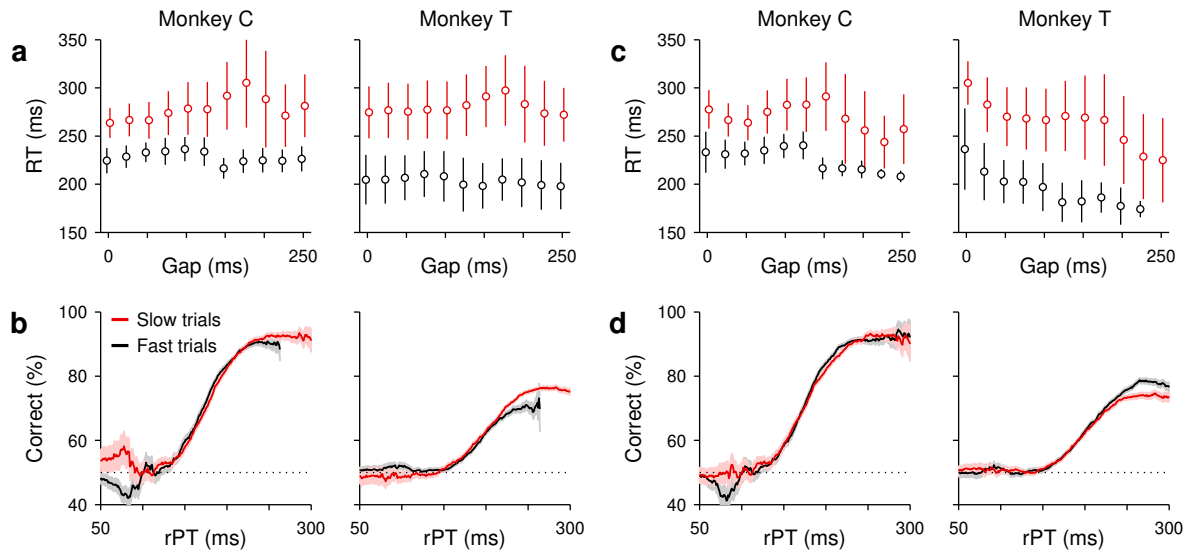

506 **Figure S1.** Perceptual and motor performance are decoupled in the CRDM task. For each monkey,  
507 trials at 100% coherence were sorted into two groups, slow (red data) and fast (black data). These  
508 groups were defined in two ways. In Method 1, slow and fast trials were simply those with RTs  
509 above and below the overall median RT, respectively. In Method 2, trials were first sorted into  
510 non-overlapping rPT bins (20 ms width), and then the trials in each bin were split into slow and  
511 fast according to the median RT of that bin. **a, b**, Mean RT  $\pm$  1 SD as a function of gap (**a**) and  
512 percentage of correct choices  $\pm$  1 SE as a function of processing time, or tachometric curve (**b**),  
513 for the slow and fast trials obtained with Method 1. **c, d**, As in **a, b**, but for the slow and fast  
514 trials obtained with Method 2. All results are from the CRDM behavioral sessions; same 100%  
515 coherence data as in Fig. 1c. In spite of the large differences in RT, the fast and slow trials yielded  
516 tachometric curves that were largely indistinguishable. This shows that, under urgent conditions,  
517 perceptual performance (response accuracy) during motion discrimination can be reliably quanti-  
518 fied independently of motor performance (response speed).  
519



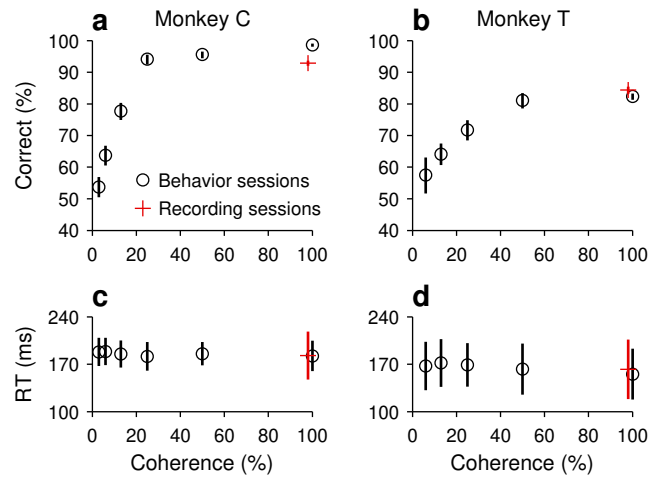

520

521 **Figure S2.** Performance in the non-urgent RDM task. **a**, Percentage of correct choices as a func-  
522 tion of stimulus coherence. Data are from monkey C collected during behavioral sessions (black  
523 circles,  $n = 7363$  trials) or during the recording sessions (red cross,  $n = 8685$  trials). Error bars  
524 indicate 95% confidence intervals. **b**, Mean RT  $\pm 1$  SD across trials. **c**, **d**, As in **a**, **b**, but for monkey  
525 T (black circles,  $n = 4547$  trials; red cross,  $n = 3952$  trials).

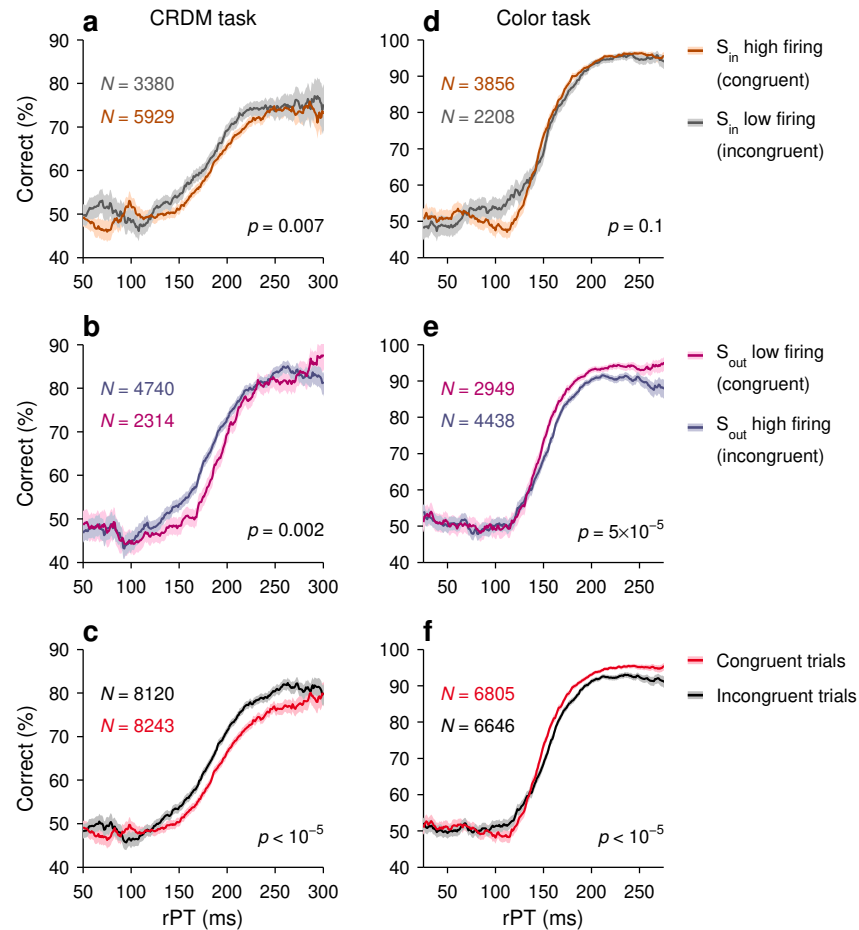

526 **Figure S3.** Behavioral performance in the urgent tasks conditioned on LIP neuronal activity. **a**,  
 527 Tachometric curves from all the CRDM trials in which the outcome was a saccade into the recorded  
 528 cell's RF ( $S_{in}$ ). For each neuron ( $n = 51$ ),  $S_{in}$  trials were split according to whether the response  
 529 was at or above the median (brown curve, high firing), or below the median (gray curve, low  
 530 firing). The response was the spike count elicited in the 50 ms immediately preceding the onset  
 531 of the saccade. High firing in  $S_{in}$  trials is congruent with a strong spatial signal, whereas low  
 532 firing is incongruent. **b**, Tachometric curves from all the CRDM trials in which the outcome was  
 533 a saccade away from the recorded cell's RF ( $S_{out}$ ). For each neuron,  $S_{out}$  trials were split accord-  
 534 ing to whether the response was at or above the median (blue curve, high firing), or below the  
 535 median (purple curve, low firing). Low firing in  $S_{out}$  trials is congruent with a strong spatial sig-  
 536 nal, whereas high firing is incongruent. **c**, Results combining all congruent and incongruent trials  
 537 across conditions. **d-f**, As in **a-c**, but for the urgent color discrimination task ( $n = 56$ ). Signifi-  
 538 cance values shown are from resampling tests on the mean difference between each pair of curves  
 539 (Methods). This difference was evaluated for rPTs of 130–230 ms for the CRDM data and for rPTs  
 540 of 140–280 ms for the urgent color discrimination data (these ranges apply to all comparisons be-  
 541 tween conditioned curves in this and other figures).  $N$  indicates number of trials. Data in **c**, **f** are  
 542 the same as in Fig. 3c, f. Note that the results are consistent between  $S_{in}$  and  $S_{out}$  conditions.  
 543

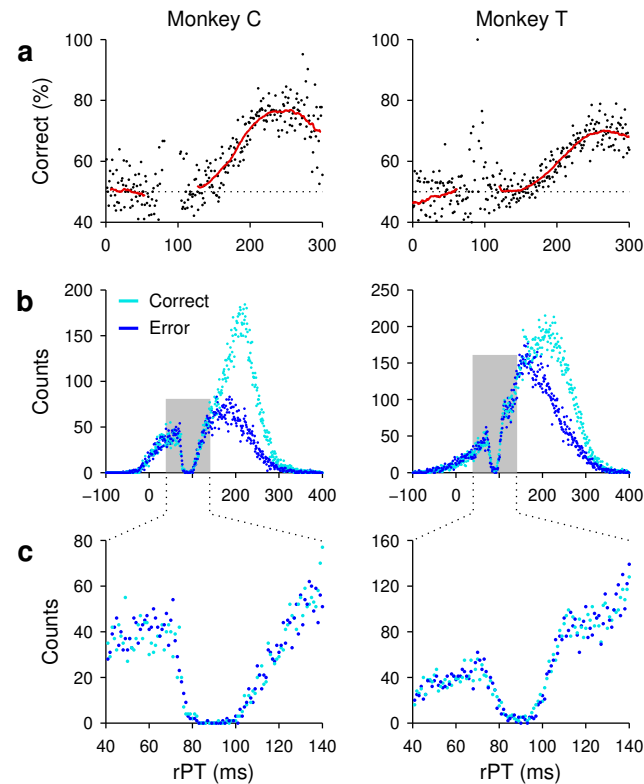

544 **Figure S4.** Evidence of spatial conflict in the CRDM task. **a**, Percentage of correct choices as  
545 a function of raw processing time. The data comprise all trials from the behavioral sessions of  
546 monkey C (left column) and monkey T (right column), and include all coherences. Trials ( $n =$   
547 30473 for monkey C,  $n = 52945$  for monkey T) were sorted into 50 ms bins (red curve, bins shifted  
548 every 1 ms), as done for tachometric curves shown in other figures, or into 1 ms bins (black dots).  
549 **b**, Processing time distributions for correct (cyan) and incorrect (blue) choices from the same trials  
550 in **a**, sorted into 1 ms bins. **c**, Enlarged view of the data in **b** between 40 and 140 ms of rPT.  
551 Note the prominent dip in the number of events at 80–100 ms. We interpret the lack of saccades  
552 during this narrow interval as an interruption of the ongoing motor plans due to the onset of the  
553 moving-dot stimulus. This is entirely consistent both with the capture of exogenous attention by a  
554 salient stimulus<sup>17,35,101</sup> and with the related phenomenology of saccadic inhibition<sup>102,103,104</sup>. The  
555 timing of this dip ( $\sim 90$  ms after cue onset) is also consistent with a slight decrease in LIP activity  
556 often observed<sup>4,5,8,11</sup> in the non-urgent RDM task (Fig. S6a). For a brief moment, the cue-driven  
557 activation at the location of the random dots is in intense conflict with the oculomotor activity that  
558 generates saccades to the choice targets.  
559

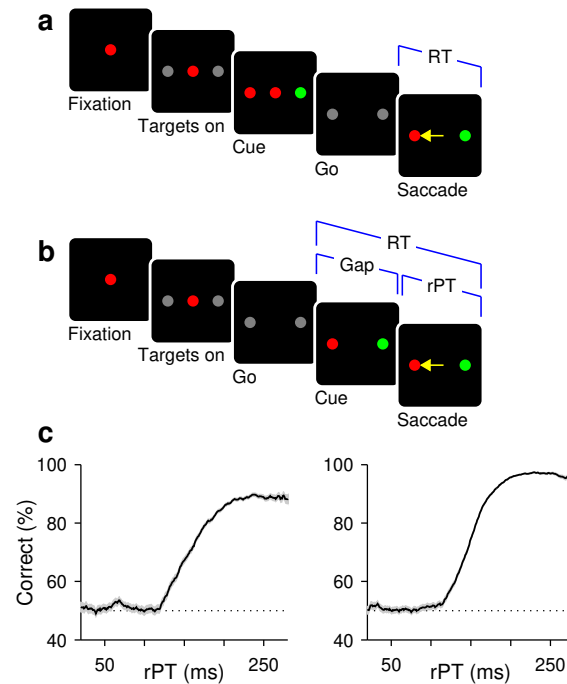

560 **Figure S5.** Urgent and non-urgent color-discrimination tasks. Subjects had to look to the peripheral target that matched the color of the fixation point. **a**, Easy, non-urgent task. The color stimuli  
561 are presented (Cue, 500–1000 ms) and evaluated well before the go signal (fixation point offset;  
562 Go). **b**, Urgent task. The color stimuli are presented (Cue) after the go signal (Go), with an unpredictable  
563 delay between them (Gap, 0–250) and a limited RT time window for responding (350–425  
564 ms). The perceptual evaluation must occur during the cue-viewing interval ( $rPT = RT - \text{gap}$ ), as  
565 the motor plan develops. **c**, Percentage of correct responses as a function of rPT, or tachometric  
566 curve. Results are from all the recording sessions during which the urgent color-discrimination  
567 task was performed by monkeys C (left,  $n = 7330$  trials) and T (right,  $n = 10745$  trials). Shades  
568 indicate  $\pm 1$  SE from binomial statistics.  
569  
570

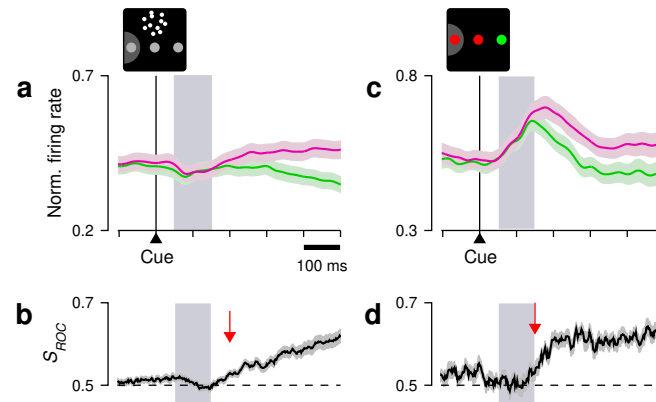

571 **Figure S6.** Cue-driven LIP responses in the non-urgent motion- and color-based discrimination  
572 tasks are indicative of the deployment of spatial attention. **a**, Neuronal activity into (magenta)  
573 and away from the RF (green) in the non-urgent RDM task ( $n = 51$ ). Same data as in Fig. 2c, but  
574 restricted to the period following cue onset. **b**, Spatial signal magnitude,  $S_{ROC}$ , as a function of  
575 time, for the data in c. Arrow marks approximate onset of differentiation. Same data as in Fig. 2d,  
576 but over a restricted time period. **c**, **d**, As in **a**, **b**, but for the non-urgent color discrimination task  
577 ( $n = 43$ ). Same data as in Fig. 4c, d, but over a restricted time period. Note the change in activity  
578 in the 50–150 ms following cue onset (gray, shaded areas): after the motion stimulus appears near  
579 fixation (panel **a**), the LIP activity associated with the choice-target locations decreases slightly, as  
580 found in previous studies<sup>4,5,8,9,11</sup>; in contrast, after the color change of the choice targets (panel **c**),  
581 activity clearly increases. The decrease in **a** is maximal  $\sim 90$  ms after cue onset, at the same time  
582 that (uninformed) saccades to the choice targets are completely suppressed in the urgent CRDM  
583 task (Fig. S4). Interpreting the LIP activity as an attention signal, the motion stimulus near fixation  
584 acts as if to suppress attention at the choice targets, whereas the color change at those targets acts  
585 as if to increase the intensity of the existing signal.  
586

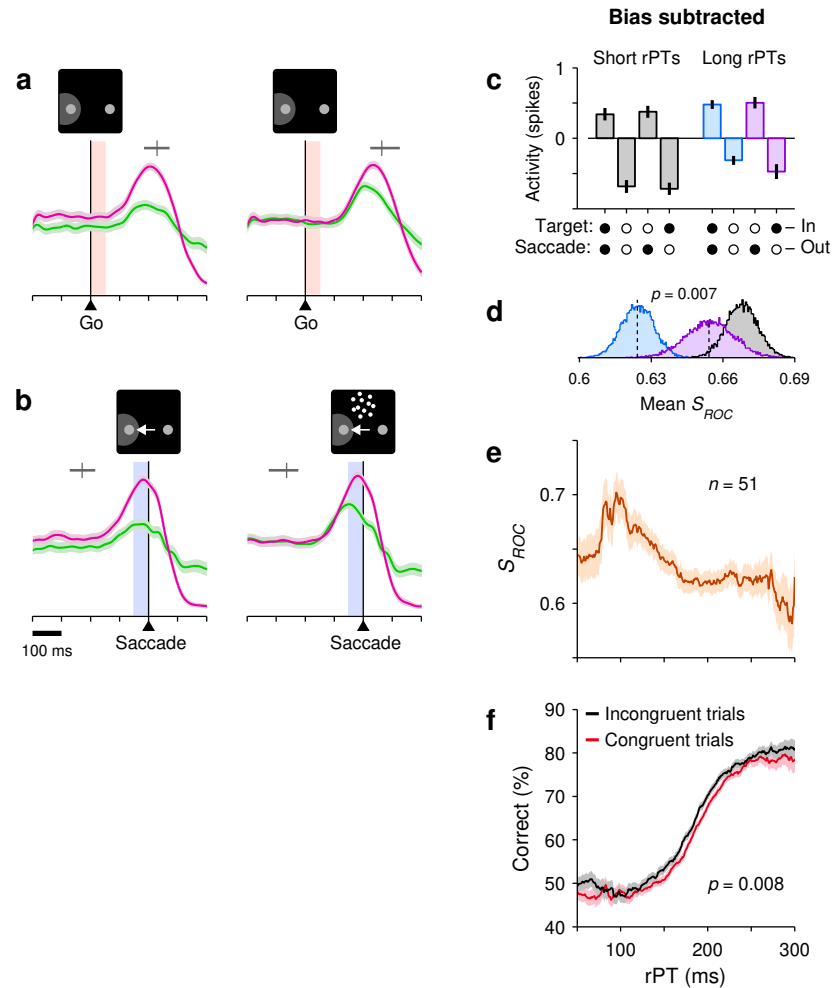

587 **Figure S7.** An early choice bias does not account for the results in the CRDM task. **a**, Mean,  
 588 normalized LIP activity recorded in the CRDM task ( $n = 51$ ) aligned on the go signal. Colors  
 589 indicate saccadic choices into (pink) or away from the RF (green), with trials sorted into guesses  
 590 (left,  $rPT \leq 150$  ms) and fully informed discriminations (right,  $rPT \geq 200$  ms). The horizontal  
 591 gray bar marks the saccade onset (90% range and median). To quantify the early bias in each  
 592 trial, spikes were counted in the 50 ms time window immediately following the go signal (shaded  
 593 areas). **b**, Mean, normalized LIP activity recorded in the CRDM task aligned on saccade onset.  
 594 Same data as in Fig. 2e, f; same trials as in a, but aligned differently. The horizontal gray bar  
 595 marks the go signal (90% range and median). To quantify the presaccadic activity in each trial,  
 596 spikes were counted in the 50 ms time window immediately preceding the saccade onset (shaded  
 597 areas). **c-f**, Analysis results obtained after subtracting the early bias. The neural response in each  
 598 trial was equal to the spike count from the standard presaccadic window (blue shade in b) minus  
 599 the spike count from the earlier bias window (red shade in a). **c**, Mean normalized responses  
 600 sorted by outcome, as in Fig. 3a. **d**, Mean differential signal magnitudes for the three conditions in  
 601 panel c indicated by color, as in Fig. 3b. **e**, Neuronal performance curve showing  $S_{ROC}$  (mean  $\pm 1$   
 602 SE across trials) as a function of rPT, as in Fig. 2h. **f**, Performance in the CRDM task conditioned  
 603 on neuronal activity, as in Fig. 3c. The spatial signal based on the bias-subtracted spike counts  
 604 demonstrated the all same trends found originally with the unaltered presaccadic responses.  
 605

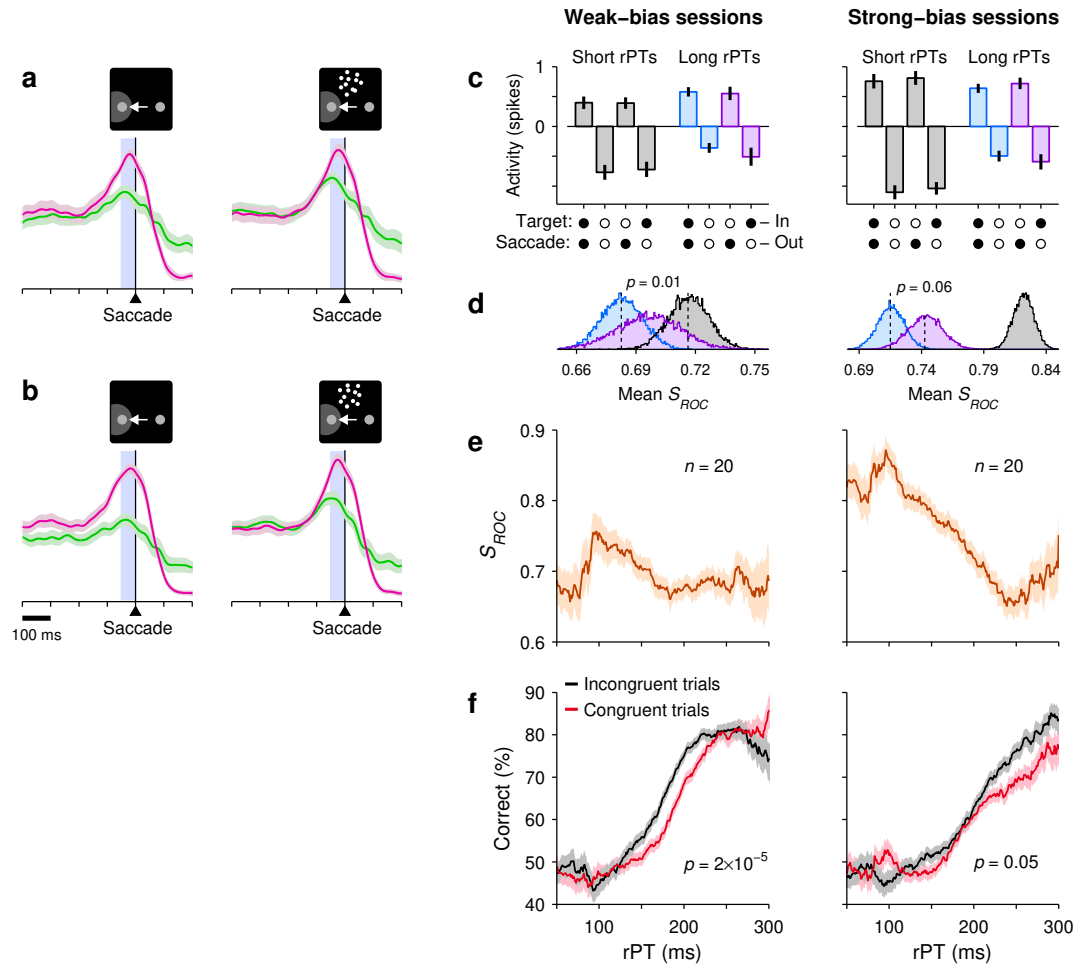

606 **Figure S8.** The correlation between LIP activity and CRDM behavior is qualitatively the same for  
 607 sessions in which a weak or a strong choice bias was observed. For each experimental session, the  
 608 early bias was quantified by counting the spikes evoked in the 50 ms immediately following the  
 609 go signal (Fig. S7a, shaded areas), and calculating a spatial discrimination index ( $S_{ROC}$ ) using all  
 610 the spike counts from that session. Based on this index, the 20 sessions with the weakest bias and  
 611 the 20 with the strongest were identified, and analyses were run separately for the two groups. **a**,  
 612 Mean, normalized LIP activity as a function of time in the sessions with the weakest early bias.  
 613 Colors indicate saccadic choices into (pink) or away from the RF (green), with trials sorted into  
 614 guesses (left, rPT  $\leq 150$  ms) and fully informed discriminations (right, rPT  $\geq 200$  ms). **b**, As in  
 615 **a**, but for the sessions with the strongest early bias. **c–f**, Analysis results for weak- (left column)  
 616 and strong-bias sessions (right column). **c**, Mean normalized responses sorted by outcome, as in  
 617 Fig. 3a. **d**, Mean differential signal magnitudes for the three conditions in panel **c** indicated by  
 618 color, as in Fig. 3b. **e**, Neuronal performance curves showing the presaccadic  $S_{ROC}$  (mean  $\pm 1$  SE  
 619 across trials) as a function of rPT, as in Fig. 2h. **f**, Performance conditioned on neuronal activity,  
 620 as in Fig. 3c. Although the magnitude of the spatial signal before the saccade did vary with the  
 621 magnitude of the early bias, stronger presaccadic differentiation was still associated with shorter  
 622 processing times and poorer performance, regardless of the bias.  
 623

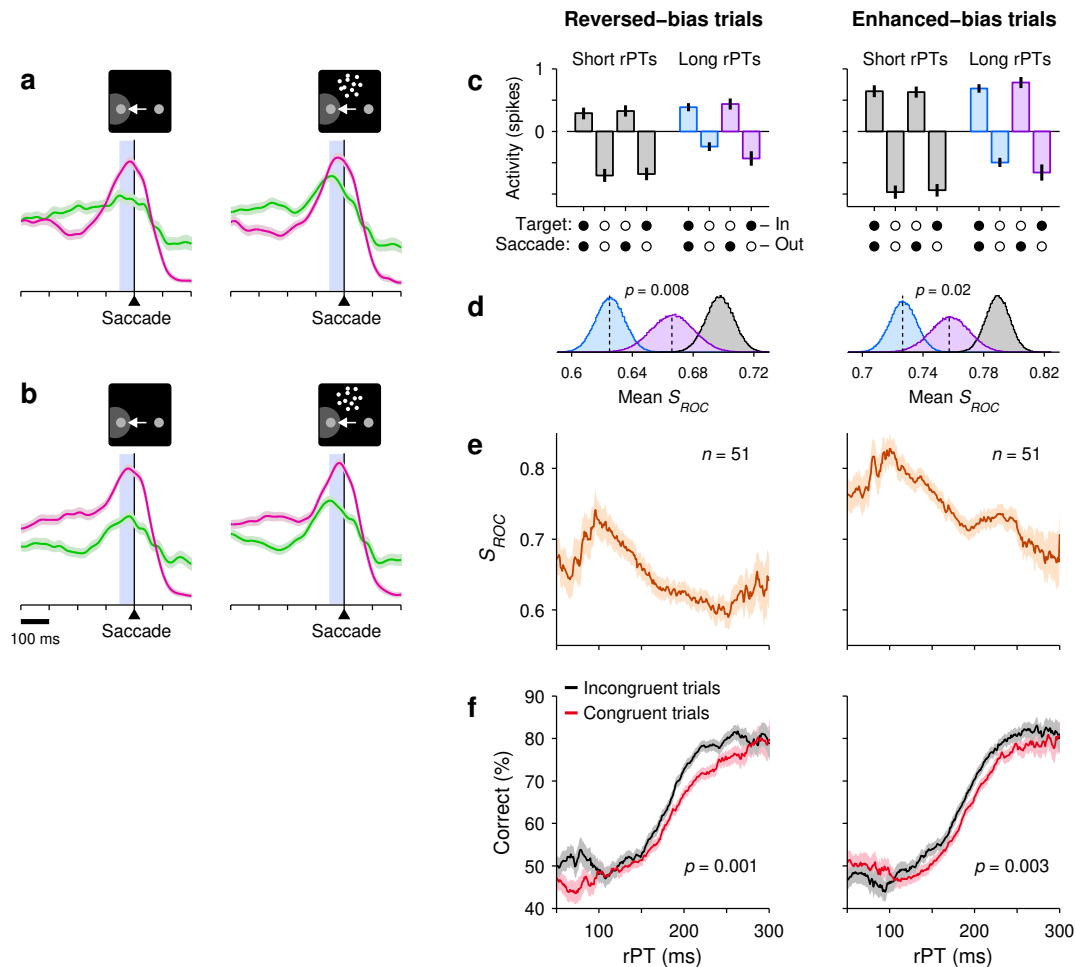

624 **Figure S9.** Creating artificial biases through trial sorting does not change the observed correlation  
 625 between LIP activity and CRDM behavior. For each recorded neuron, the early bias in each trial  
 626 was quantified by counting the spikes evoked in the 50 ms immediately following the go signal  
 627 (Fig. S7a, shaded areas). Then, trials into and away from the RF were separately split into two  
 628 groups according to the median spike count in the bias window, and the data for each of the 4  
 629 resulting groups were pooled across neurons. Finally, two such groups of trials (strong response  
 630 in; weak response away) were paired to create a data set with an enhanced bias into the RF, and  
 631 the other two groups (weak response in; strong response away) were paired to create a data set  
 632 with a reversed bias, i.e., a bias away. Analyses were then run on the two halves of the data thus  
 633 parsed. **a**, Mean, normalized LIP activity as a function of time for the data set with a reversed bias  
 634 initially favoring the away direction. Colors indicate saccadic choices into (pink) or away from the  
 635 RF (green), with trials sorted into guesses (left,  $rPT \leq 150$  ms) and fully informed discriminations  
 636 (right,  $rPT \geq 200$  ms). **b**, As in **a**, but for the data set with an enhanced early bias toward the RF.  
 637 **c–f**, Analysis results for reversed- (left column) and enhanced-bias data sets (right column). Same  
 638 format as in Fig. S8c–f. Sorting trials in this fashion strongly alters the starting point of the evoked  
 639 presaccadic responses, but the subsequent changes in activity maintain a consistent qualitative  
 640 relationship with processing time and choice outcome, regardless of that initial condition.  
 641



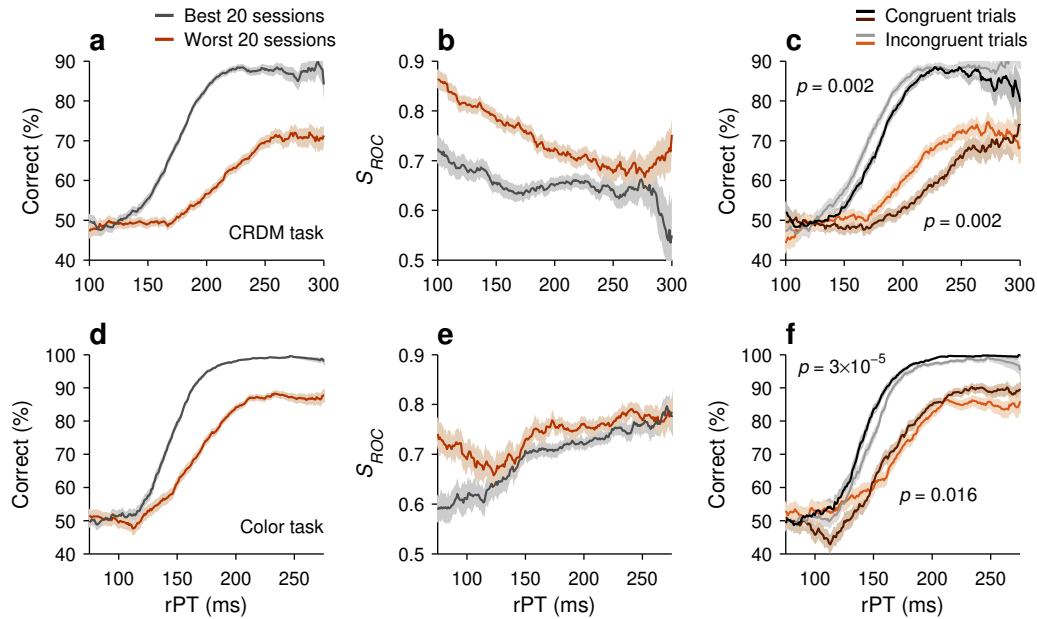

642  
643 **Figure S10.** Modulation of LIP activity during high- versus low-performance sessions. For both  
644 the motion- and color-based urgent tasks, recording sessions were ranked according to overall  
645 percent correct. The 20 sessions with the best performance (gray traces) and the 20 sessions with  
646 the poorest performance (brown traces) were selected, and analyses were run for each group sepa-  
647 rately. **a**, Tachometric curves, i.e., percent correct as a function of processing time, for the best and  
648 worst CRDM sessions. **b**, Neurometric curves in the CRDM task, i.e., magnitude of presaccadic  
649 differentiation as a function of processing time (as in Fig. 2h). In both groups of sessions, stronger  
650 LIP differentiation was associated with less evidence (shorter rPTs). **c**, Tachometric curves condi-  
651 tioned on neuronal activity in the CRDM task (as in Fig. 3c). In both groups of sessions, stronger  
652 LIP differentiation (congruent condition) was associated with worse perceptual performance. **d**-  
653 **f**, Same as **a**-**c**, but for the urgent color discrimination task (as in Figs. 4h and 3f). In this task,  
654 stronger LIP differentiation was associated with more evidence (longer rPTs; **e**) and improved  
655 perceptual performance (**f**). In each task, the relationship between neuronal activity in LIP and  
656 behavior was similar for the two groups of sessions, in spite of the dramatically different perfor-  
657 mance levels.

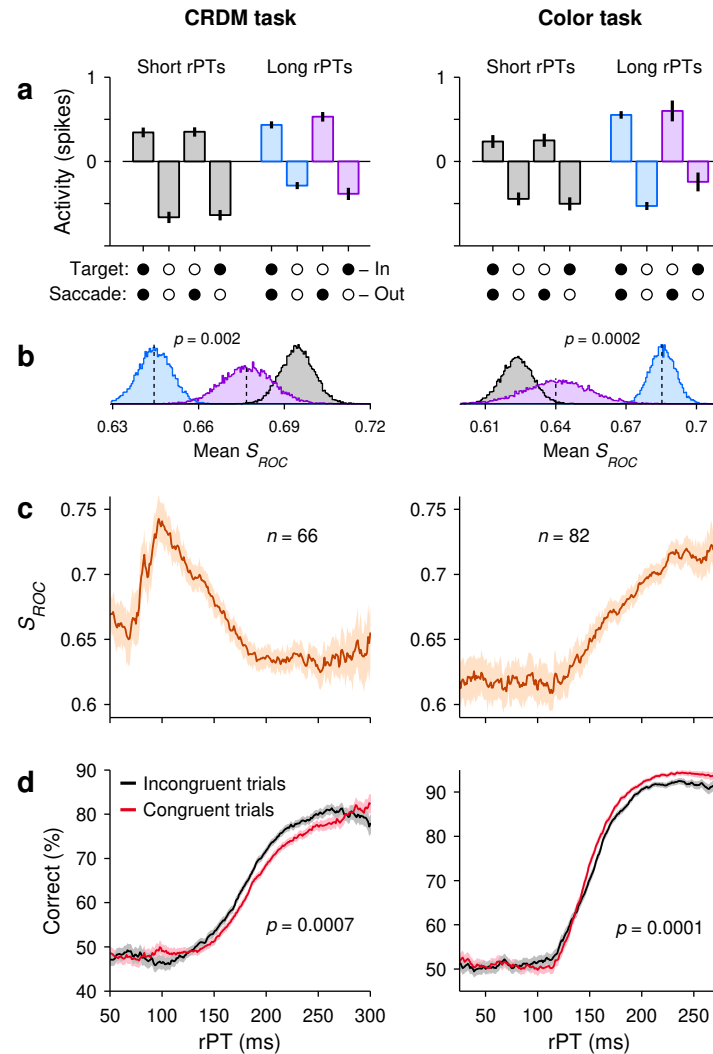

658 **Figure S11.** Results with extended neuronal populations. The results in the main figures were  
 659 based on neurons ( $n = 51$  for the CRDM task,  $n = 56$  for the urgent color discrimination task) that  
 660 were fully characterized and satisfied several criteria: they had both visually-driven and saccade-  
 661 related responses, and their RFs were well defined and consistent across tasks (Methods). This  
 662 resulted in the exclusion of 15 additional neurons recorded in the CRDM experiment and 26 in  
 663 the color-based. Here we show the results of analyses that included all the neurons recorded in  
 664 the CRDM (left column,  $n = 66$ ) and the urgent color discrimination task (right column,  $n = 82$ ),  
 665 with no exclusions. **a**, Mean, normalized neuronal activity pooled across neurons and sorted by  
 666 experimental condition (as in Fig. 3a, d). **b**, Distributions for mean presaccadic differentiation  
 667 values ( $S_{ROC}$ ), obtained by bootstrapping, for each of the three conditions above, as indicated by  
 668 the corresponding colors (as in Fig. 3b, e). **c**, Neurometric curves, i.e., magnitude of presaccadic  
 669 differentiation as a function of processing time (as in Figs. 2h, 4h). **d**, Behavioral performance  
 670 conditioned on neuronal activity (as in Fig. 3c, e). Inclusion of the additional populations did not  
 671 alter the results substantially.  
 672

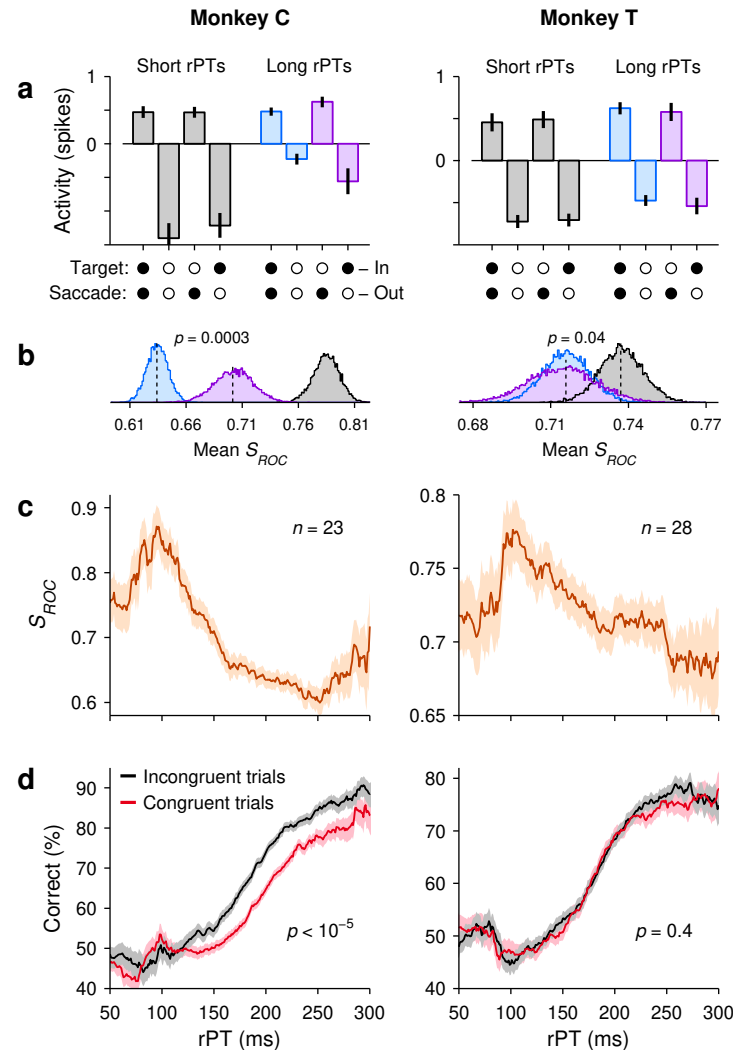

673 **Figure S12.** Key results in the CRDM task computed separately for monkeys C (left column,  $n =$   
674 23) and T (right column,  $n = 28$ ). **a**, Normalized LIP activity during guesses ( $rPT \leq 150$  ms,  
675 gray) and informed choices ( $rPT > 150$  ms, blue, purple) sorted by experimental condition (as in  
676 Fig. 3a). **b**, Distributions for mean presaccadic differentiation values ( $S_{ROC}$ ) for each of the three  
677 conditions above, as indicated by color (as in Fig. 3b). **c**, Neurometric curve, i.e., magnitude of pre-  
678 saccadic differentiation as a function of processing time (as in Fig. 2h). **d**, Behavioral performance  
679 conditioned on neuronal activity (as in Fig. 3c).  
680

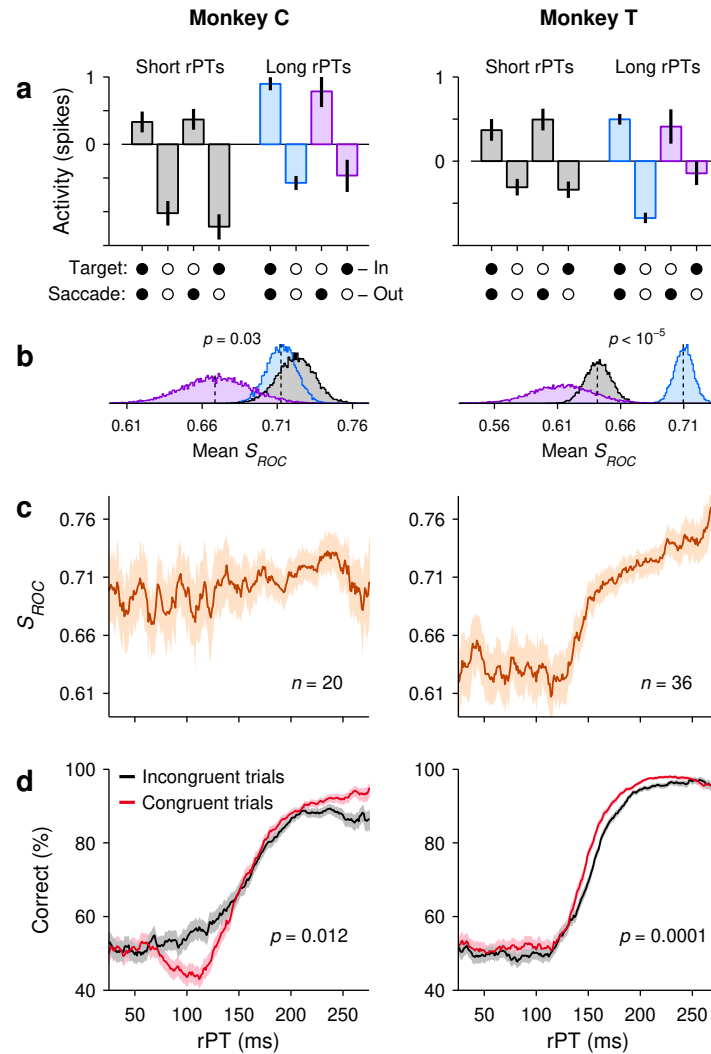

681 **Figure S13.** Key results in the urgent color discrimination task computed separately for monkeys  
 682 C (left column,  $n = 20$ ) and T (right column,  $n = 36$ ). **a**, Normalized LIP activity during guesses  
 683 (rPT  $\leq 125$  ms, gray) and informed choices (rPT  $> 125$  ms, blue, purple) sorted by experimental  
 684 condition (as in Fig. 3d). **b**, Distributions for mean presaccadic differentiation values ( $S_{ROC}$ ) for  
 685 each of the three conditions above, as indicated by color (as in Fig. 3e). **c**, Neurometric curve,  
 686 i.e., magnitude of presaccadic differentiation as a function of processing time (as in Fig. 4h). **d**,  
 687 Behavioral performance conditioned on neuronal activity (as in Fig. 3f).  
 688

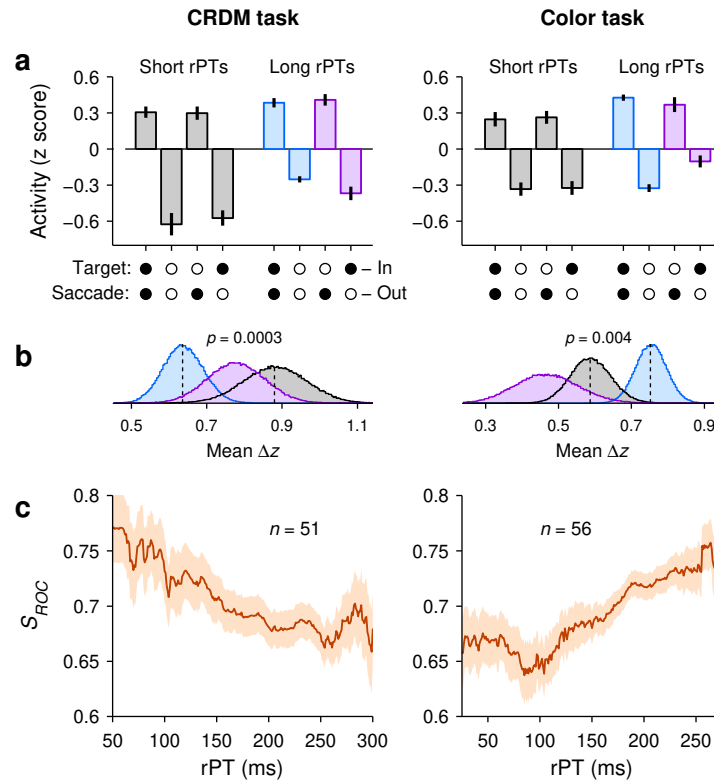

689 **Figure S14.** Alternate procedure for combining the data across neurons. In the main figures  
 690 (Figs. 2h, 4h, 3a, d), we first pooled all the spike counts from all the neurons, separately for sac-  
 691 cades into ( $S_{in}$ ) and away from the RF ( $S_{out}$ ), and then quantified the separation between the two  
 692 resulting distributions by computing the  $S_{ROC}$  (Methods; Fig. S15). Here we present an alternate  
 693 analysis in which  $S_{in}$  and  $S_{out}$  conditions are first contrasted for each neuron and then the results  
 694 are averaged across neurons. Results are for the CRDM (left column,  $n = 51$ ) and the urgent color  
 695 discrimination task (right column,  $n = 56$ ). **a**, LIP activity during guesses and informed choices  
 696 sorted by outcome (same short- and long-rPT intervals as in Fig. 3a, d). Activity corresponds to  
 697 presaccadic spike counts (same as in other analyses) that were z-scored for each neuron and then  
 698 averaged across neurons. Data are mean  $\pm$  1 SE across cells. **b**, Differential signal magnitudes for  
 699 the three conditions in **a** indicated by color. Here, the differential signal of each cell is the mean  
 700 difference between the z-scored responses in  $S_{in}$  and  $S_{out}$  conditions. Thus, the mean  $\Delta z$  is equal  
 701 to  $\langle z_{IN} - z_{OUT} \rangle$ , where the brackets indicate an average over neurons. Curves are bootstrapped  
 702 distributions. **c**, Mean neurometric curve, i.e., magnitude of presaccadic differentiation as a func-  
 703 tion of processing time. In this case, a neurometric curve was first computed for each individual  
 704 neuron (bin width = 81 ms) and then the results were averaged over neurons. Shades indicate  $\pm$   
 705 1 SE across cells. The results of these analyses are more variable than those in the main figures,  
 706 but show the same qualitative trends for how spatial discriminability depends on processing time  
 707 and trial outcome in each task.  
 708

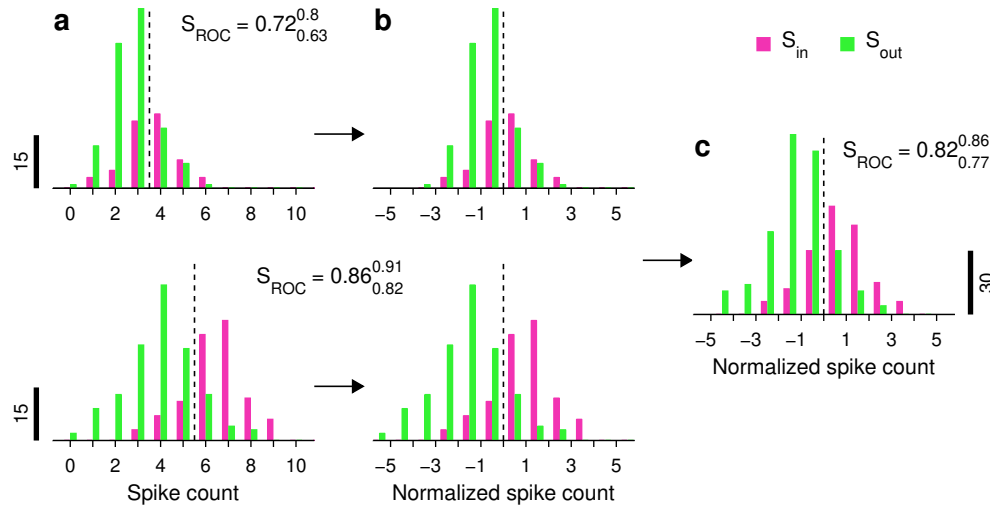

709 **Figure S15.** Procedure for pooling the data across neurons before computing the average magni-  
 710 tude of their spatial signal. This example illustrates the pooling method for two neurons recorded  
 711 in the CRDM task. For each cell, the response in each trial was the spike count collected in the 50  
 712 ms immediately preceding saccade onset. Responses were sorted by condition, for trials in which  
 713 the saccade was into the RF ( $S_{in}$ , pink bars) and for trials in which the saccade was away ( $S_{out}$ ,  
 714 green bars). In this case all rPTs are included. **a**, Spike count histograms from two LIP neurons.  
 715 For each cell, the dashed line is the value ( $\theta$ ) intermediate between the mean spike counts for  $S_{in}$   
 716 and  $S_{out}$  trials. The magnitude of the differential response based on each cell's data is indicated,  
 717 with 95% confidence limits (from bootstrap). **b**, Same data as in **a**, but after having subtracted  
 718  $\theta$  from each spike count. Individual  $S_{ROC}$  values do not change, as they are invariant to linear  
 719 transformations of the data. **c**, Histograms for the pooled, normalized data from the two neurons.  
 720 Note that the resulting  $S_{ROC}$ , which is computed exactly as for the single cells, is intermediate  
 721 between their values.  
 722

723 **Supplementary references**

- 724 101. Busse L, Katzner S, Treue S (2008) Temporal dynamics of neuronal modulation during ex-  
725 ogenous and endogenous shifts of visual attention in macaque area MT. *Proc Natl Acad Sci*  
726 *USA* 105:16380–16385.
- 727 102. Bompas A, Sumner P (2011) Saccadic inhibition reveals the timing of automatic and volun-  
728 tary signals in the human brain. *J Neurosci* 31:12501–12512.
- 729 103. Buonocore A, Purokayastha S, McIntosh RD (2017) Saccade reorienting is facilitated by paus-  
730 ing the oculomotor program. *J Cogn Neurosci* 18:1–13.
- 731 104. Salinas E, Stanford TR (2018) Saccadic inhibition interrupts ongoing oculomotor activity to  
732 enable the rapid deployment of alternate movement plans. *Sci Rep* 8:14163.
